# Supplementary material for: Effects of Training through Induced Variability on Performance in the Forehand Approach Shot in Tennis
Source: Preprints.org preprint supplement (doi:10.20944/preprints202403.0926.v1), 2024-03-15
Supplement: Supplementary file 1 [file supplementary]

## Sheet: Hoja1
Subject	Group	Ensayo	ER_Pre	ER_Post	ER_Ret	Sexo	Edad	Talla	Altura	Peso	IMC	ITN
1	2	1	206.636	23.5017	331.72	1	13.7636	165.3	168.5	67.5	24.7035	3
1	2	2	214.592	30.1559	219.997	1	13.7636	165.3	168.5	67.5	24.7035	3
1	2	3	115.717	71.0854	186.656	1	13.7636	165.3	168.5	67.5	24.7035	3
1	2	4	108.937	94.5438	316.864	1	13.7636	165.3	168.5	67.5	24.7035	3
1	2	5	169.538	109.128	89.6248	1	13.7636	165.3	168.5	67.5	24.7035	3
1	2	6	182.125	103.685	209.639	1	13.7636	165.3	168.5	67.5	24.7035	3
1	2	7	200.142	24.993	197.114	1	13.7636	165.3	168.5	67.5	24.7035	3
1	2	8	284.948	37.4012	276.931	1	13.7636	165.3	168.5	67.5	24.7035	3
1	2	9	323.74	41.2826	462.657	1	13.7636	165.3	168.5	67.5	24.7035	3
1	2	10	283.451	31.4302	89.4009	1	13.7636	165.3	168.5	67.5	24.7035	3
1	2	11	118.824	163.182	115.046	1	13.7636	165.3	168.5	67.5	24.7035	3
1	2	12	70.4586	122.152	43.9742	1	13.7636	165.3	168.5	67.5	24.7035	3
1	2	13	76.6656	64.4492	115.216	1	13.7636	165.3	168.5	67.5	24.7035	3
1	2	14	70.4162	47.5987	153.664	1	13.7636	165.3	168.5	67.5	24.7035	3
1	2	15	165.518	46.5348	15.9176	1	13.7636	165.3	168.5	67.5	24.7035	3
1	2	16	271.044	219.691	55.5757	1	13.7636	165.3	168.5	67.5	24.7035	3
1	2	17	403.152	44.239	121.205	1	13.7636	165.3	168.5	67.5	24.7035	3
1	2	18	108.883	74.1416	202.738	1	13.7636	165.3	168.5	67.5	24.7035	3
1	2	19	82.7409	60.3451	186.708	1	13.7636	165.3	168.5	67.5	24.7035	3
1	2	20	84.9895	174.133	201.393	1	13.7636	165.3	168.5	67.5	24.7035	3
1	2	21	93.9839	255.997	275.54	1	13.7636	165.3	168.5	67.5	24.7035	3
1	2	22	62.2101	157.11	202.738	1	13.7636	165.3	168.5	67.5	24.7035	3
1	2	23	92.2436	24.5359	288.798	1	13.7636	165.3	168.5	67.5	24.7035	3
1	2	24	133.601	138.772	307.247	1	13.7636	165.3	168.5	67.5	24.7035	3
1	2	25	190.891	29.4593	156.068	1	13.7636	165.3	168.5	67.5	24.7035	3
1	2	26	331.181	23.0315	145.162	1	13.7636	165.3	168.5	67.5	24.7035	3
1	2	27	295.509	93.2578	222.701	1	13.7636	165.3	168.5	67.5	24.7035	3
1	2	28	209.874	73.059	206.334	1	13.7636	165.3	168.5	67.5	24.7035	3
1	2	29	194.376	83.2431	97.8493	1	13.7636	165.3	168.5	67.5	24.7035	3
1	2	30	107.244	41.8607	118.433	1	13.7636	165.3	168.5	67.5	24.7035	3
1	2	31	109.273	131.52	137.796	1	13.7636	165.3	168.5	67.5	24.7035	3
1	2	32	112.182	67.5007	161.646	1	13.7636	165.3	168.5	67.5	24.7035	3
1	2	33	85.4518	45.668	161.972	1	13.7636	165.3	168.5	67.5	24.7035	3
1	2	34	75.9219	114.552	97.8493	1	13.7636	165.3	168.5	67.5	24.7035	3
1	2	35	124.435	288.967	98.8175	1	13.7636	165.3	168.5	67.5	24.7035	3
1	2	36	253.943	290.198	71.9173	1	13.7636	165.3	168.5	67.5	24.7035	3
1	2	37	151.84	229.353	110.981	1	13.7636	165.3	168.5	67.5	24.7035	3
1	2	38	242.315	53.7582	155.515	1	13.7636	165.3	168.5	67.5	24.7035	3
1	2	39	104.154	35.9828	143.294	1	13.7636	165.3	168.5	67.5	24.7035	3
1	2	40	86.1722	112.308	48.7976	1	13.7636	165.3	168.5	67.5	24.7035	3
1	2	41	86.6797	22.3618	71.5129	1	13.7636	165.3	168.5	67.5	24.7035	3
1	2	42	136.592	111.08	139.267	1	13.7636	165.3	168.5	67.5	24.7035	3
1	2	43	187.998	98.2733	140.735	1	13.7636	165.3	168.5	67.5	24.7035	3
1	2	44	139.64	56.634		1	13.7636	165.3	168.5	67.5	24.7035	3
1	2	45	85.0805	61.3538		1	13.7636	165.3	168.5	67.5	24.7035	3
1	2	46	14.4475	132.947		1	13.7636	165.3	168.5	67.5	24.7035	3
1	2	47	129.46	411.936		1	13.7636	165.3	168.5	67.5	24.7035	3
1	2	48	187.702	188.865		1	13.7636	165.3	168.5	67.5	24.7035	3
1	2	49	89.833	27.9256		1	13.7636	165.3	168.5	67.5	24.7035	3
1	2	50				1	13.7636	165.3	168.5	67.5	24.7035	3
1	2	51				1	13.7636	165.3	168.5	67.5	24.7035	3
1	2	52				1	13.7636	165.3	168.5	67.5	24.7035	3
1	2	53				1	13.7636	165.3	168.5	67.5	24.7035	3
1	2	54				1	13.7636	165.3	168.5	67.5	24.7035	3
1	2	55				1	13.7636	165.3	168.5	67.5	24.7035	3
1	2	56				1	13.7636	165.3	168.5	67.5	24.7035	3
1	2	57				1	13.7636	165.3	168.5	67.5	24.7035	3
1	2	58				1	13.7636	165.3	168.5	67.5	24.7035	3
1	2	59				1	13.7636	165.3	168.5	67.5	24.7035	3
1	2	60				1	13.7636	165.3	168.5	67.5	24.7035	3
2	2	1	57.0197	43.0813	125.985	1	13.3282	170.3	172.5	55.2	19.0331	4
2	2	2	87.0463	65.0932	99.3936	1	13.3282	170.3	172.5	55.2	19.0331	4
2	2	3	114.744	54.0646	93.1885	1	13.3282	170.3	172.5	55.2	19.0331	4
2	2	4	114.13	34.6808	23.6434	1	13.3282	170.3	172.5	55.2	19.0331	4
2	2	5	178.871	51.8683	135.2	1	13.3282	170.3	172.5	55.2	19.0331	4
2	2	6	372.449	69.7603	42.0773	1	13.3282	170.3	172.5	55.2	19.0331	4
2	2	7	245.001	54.3472	99.8211	1	13.3282	170.3	172.5	55.2	19.0331	4
2	2	8	114.547	114.92	140.735	1	13.3282	170.3	172.5	55.2	19.0331	4
2	2	9	98.0961	170.676	72.8892	1	13.3282	170.3	172.5	55.2	19.0331	4
2	2	10	133.09	114.851	57.3781	1	13.3282	170.3	172.5	55.2	19.0331	4
2	2	11	315.453	43.6406	226.756	1	13.3282	170.3	172.5	55.2	19.0331	4
2	2	12	380.39	32.719	199.729	1	13.3282	170.3	172.5	55.2	19.0331	4
2	2	13	212.967	17.9338	94.0938	1	13.3282	170.3	172.5	55.2	19.0331	4
2	2	14	142.556	161.741	15.0602	1	13.3282	170.3	172.5	55.2	19.0331	4
2	2	15	96.9277	85.1469	92.9866	1	13.3282	170.3	172.5	55.2	19.0331	4
2	2	16	118.584	50.1674	174.78	1	13.3282	170.3	172.5	55.2	19.0331	4
2	2	17	187.744	76.7721	61.7326	1	13.3282	170.3	172.5	55.2	19.0331	4
2	2	18	167.346	122.728	56.1044	1	13.3282	170.3	172.5	55.2	19.0331	4
2	2	19	228.226	140.002	37.3771	1	13.3282	170.3	172.5	55.2	19.0331	4
2	2	20	212.229	65.0932	64.8845	1	13.3282	170.3	172.5	55.2	19.0331	4
2	2	21	218.04	25.1334	113.1	1	13.3282	170.3	172.5	55.2	19.0331	4
2	2	22	416.715	114.836	46.0888	1	13.3282	170.3	172.5	55.2	19.0331	4
2	2	23	169.331	43.6406	230.928	1	13.3282	170.3	172.5	55.2	19.0331	4
2	2	24	93.1121	74.1734	98.3745	1	13.3282	170.3	172.5	55.2	19.0331	4
2	2	25	134.486	121.036	58.8992	1	13.3282	170.3	172.5	55.2	19.0331	4
2	2	26	108.636	76.3053	52.2009	1	13.3282	170.3	172.5	55.2	19.0331	4
2	2	27	168.161	71.8312	157.624	1	13.3282	170.3	172.5	55.2	19.0331	4
2	2	28	362.848	127.746	87.5403	1	13.3282	170.3	172.5	55.2	19.0331	4
2	2	29	379.366	183.146	67.2334	1	13.3282	170.3	172.5	55.2	19.0331	4
2	2	30	184.167	24.2792	255.962	1	13.3282	170.3	172.5	55.2	19.0331	4
2	2	31	139.81	8.82043	132.251	1	13.3282	170.3	172.5	55.2	19.0331	4
2	2	32	68.8339	135.775	113.663	1	13.3282	170.3	172.5	55.2	19.0331	4
2	2	33	120.027	71.7289	57.3371	1	13.3282	170.3	172.5	55.2	19.0331	4
2	2	34	244.543	29.0319	100.535	1	13.3282	170.3	172.5	55.2	19.0331	4
2	2	35	286.412	187.376	59.3617	1	13.3282	170.3	172.5	55.2	19.0331	4
2	2	36	299.735	36.6895	125.379	1	13.3282	170.3	172.5	55.2	19.0331	4
2	2	37	373.269	22.5515	79.126	1	13.3282	170.3	172.5	55.2	19.0331	4
2	2	38	228.984	79.7621	79.126	1	13.3282	170.3	172.5	55.2	19.0331	4
2	2	39	77.0025	132.589	156.386	1	13.3282	170.3	172.5	55.2	19.0331	4
2	2	40	78.6884	25.8118	117.7	1	13.3282	170.3	172.5	55.2	19.0331	4
2	2	41	102.392	35.4645	56.7828	1	13.3282	170.3	172.5	55.2	19.0331	4
2	2	42	238.665	138.645	103.345	1	13.3282	170.3	172.5	55.2	19.0331	4
2	2	43	180.284	68.4288	155.562	1	13.3282	170.3	172.5	55.2	19.0331	4
2	2	44	155.723	142.986	38.2027	1	13.3282	170.3	172.5	55.2	19.0331	4
2	2	45	82.947	137.671	34.6433	1	13.3282	170.3	172.5	55.2	19.0331	4
2	2	46	123.519	38.7371	35.4302	1	13.3282	170.3	172.5	55.2	19.0331	4
2	2	47	1430.4	69.0395	50.3525	1	13.3282	170.3	172.5	55.2	19.0331	4
2	2	48	499.552			1	13.3282	170.3	172.5	55.2	19.0331	4
2	2	49	399.021			1	13.3282	170.3	172.5	55.2	19.0331	4
2	2	50	202.847			1	13.3282	170.3	172.5	55.2	19.0331	4
2	2	51	301.346			1	13.3282	170.3	172.5	55.2	19.0331	4
2	2	52	308.39			1	13.3282	170.3	172.5	55.2	19.0331	4
2	2	53	894.197			1	13.3282	170.3	172.5	55.2	19.0331	4
2	2	54	184.167			1	13.3282	170.3	172.5	55.2	19.0331	4
2	2	55	562.2			1	13.3282	170.3	172.5	55.2	19.0331	4
2	2	56				1	13.3282	170.3	172.5	55.2	19.0331	4
2	2	57				1	13.3282	170.3	172.5	55.2	19.0331	4
2	2	58				1	13.3282	170.3	172.5	55.2	19.0331	4
2	2	59				1	13.3282	170.3	172.5	55.2	19.0331	4
2	2	60				1	13.3282	170.3	172.5	55.2	19.0331	4
3	2	1	210.927	105.199	26.1228	2	12.8984	160.5	162.2	58	22.5153	4
3	2	2	182.193	95.5299	55.929	2	12.8984	160.5	162.2	58	22.5153	4
3	2	3	73.1263	16.9056	132.096	2	12.8984	160.5	162.2	58	22.5153	4
3	2	4	59.9834	94.2669	80.0823	2	12.8984	160.5	162.2	58	22.5153	4
3	2	5	141.719	200.397	22.5417	2	12.8984	160.5	162.2	58	22.5153	4
3	2	6	379.68	68.6376	12.1264	2	12.8984	160.5	162.2	58	22.5153	4
3	2	7	394.386	51.0816	39.2005	2	12.8984	160.5	162.2	58	22.5153	4
3	2	8	268.544	30.3832	56.7927	2	12.8984	160.5	162.2	58	22.5153	4
3	2	9	241.277	79.5727	55.8299	2	12.8984	160.5	162.2	58	22.5153	4
3	2	10	187.722	133.616	24.4364	2	12.8984	160.5	162.2	58	22.5153	4
3	2	11	165.96	53.64	165.966	2	12.8984	160.5	162.2	58	22.5153	4
3	2	12	175.639	37.663	249.864	2	12.8984	160.5	162.2	58	22.5153	4
3	2	13	315.689	49.7154	176.739	2	12.8984	160.5	162.2	58	22.5153	4
3	2	14	367.119	83.7291	134.254	2	12.8984	160.5	162.2	58	22.5153	4
3	2	15	251.995	63.5182	139.646	2	12.8984	160.5	162.2	58	22.5153	4
3	2	16	248.148	34.0872	74.2596	2	12.8984	160.5	162.2	58	22.5153	4
3	2	17	290.198	66.1871	40.1168	2	12.8984	160.5	162.2	58	22.5153	4
3	2	18	158.058	79.0142	101.979	2	12.8984	160.5	162.2	58	22.5153	4
3	2	19	40.7404	139.096	149.735	2	12.8984	160.5	162.2	58	22.5153	4
3	2	20	24.2844	96.2747	33.3665	2	12.8984	160.5	162.2	58	22.5153	4
3	2	21	67.5007	92.665	24.3016	2	12.8984	160.5	162.2	58	22.5153	4
3	2	22	238.453	139.257	64.4889	2	12.8984	160.5	162.2	58	22.5153	4
3	2	23	236.996	162.009	82.7415	2	12.8984	160.5	162.2	58	22.5153	4
3	2	24	210.475	135.766	181.104	2	12.8984	160.5	162.2	58	22.5153	4
3	2	25	61.047	99.0207	132.947	2	12.8984	160.5	162.2	58	22.5153	4
3	2	26	64.5136	114.669	15.708	2	12.8984	160.5	162.2	58	22.5153	4
3	2	27	284.288	176.976	15.9176	2	12.8984	160.5	162.2	58	22.5153	4
3	2	28	484.758	212.68	77.7069	2	12.8984	160.5	162.2	58	22.5153	4
3	2	29	410.073	124.878	76.0342	2	12.8984	160.5	162.2	58	22.5153	4
3	2	30	258.438	151.437	90.4613	2	12.8984	160.5	162.2	58	22.5153	4
3	2	31	157.305	309.934	88.2393	2	12.8984	160.5	162.2	58	22.5153	4
3	2	32	222.289	151.526	59.4135	2	12.8984	160.5	162.2	58	22.5153	4
3	2	33	307.817	89.0297	88.6937	2	12.8984	160.5	162.2	58	22.5153	4
3	2	34	529.645	42.7866	91.0126	2	12.8984	160.5	162.2	58	22.5153	4
3	2	35	415.408	24.9425	74.1734	2	12.8984	160.5	162.2	58	22.5153	4
3	2	36	32.4785	23.7034	62.7313	2	12.8984	160.5	162.2	58	22.5153	4
3	2	37	93.6359	73.0953	93.6961	2	12.8984	160.5	162.2	58	22.5153	4
3	2	38	135.951	79.5339	105.816	2	12.8984	160.5	162.2	58	22.5153	4
3	2	39	76.2969	32.2555	174.976	2	12.8984	160.5	162.2	58	22.5153	4
3	2	40	160.385	52.8777	203.103	2	12.8984	160.5	162.2	58	22.5153	4
3	2	41	344.106	67.14	127.163	2	12.8984	160.5	162.2	58	22.5153	4
3	2	42	400.626	130.736	63.4003	2	12.8984	160.5	162.2	58	22.5153	4
3	2	43	340.201	137.322	60.5575	2	12.8984	160.5	162.2	58	22.5153	4
3	2	44	162.009	41.28	22.8009	2	12.8984	160.5	162.2	58	22.5153	4
3	2	45	46.4247	30.1559	56.5703	2	12.8984	160.5	162.2	58	22.5153	4
3	2	46	115.864	84.2213	43.2752	2	12.8984	160.5	162.2	58	22.5153	4
3	2	47	342.166	84.7366	55.145	2	12.8984	160.5	162.2	58	22.5153	4
3	2	48	348.517	84.7366	55.4821	2	12.8984	160.5	162.2	58	22.5153	4
3	2	49	100.829	61.6345	92.11	2	12.8984	160.5	162.2	58	22.5153	4
3	2	50	101.626	60.3242	72.2647	2	12.8984	160.5	162.2	58	22.5153	4
3	2	51	66.5141	75.3448	73.623	2	12.8984	160.5	162.2	58	22.5153	4
3	2	52	114.445	155.608	75.4984	2	12.8984	160.5	162.2	58	22.5153	4
3	2	53	114.962	219.068	38.9873	2	12.8984	160.5	162.2	58	22.5153	4
3	2	54	47.3972	133.944	87.3212	2	12.8984	160.5	162.2	58	22.5153	4
3	2	55	822.864	155.521	171.716	2	12.8984	160.5	162.2	58	22.5153	4
3	2	56	713.381			2	12.8984	160.5	162.2	58	22.5153	4
3	2	57				2	12.8984	160.5	162.2	58	22.5153	4
3	2	58				2	12.8984	160.5	162.2	58	22.5153	4
3	2	59				2	12.8984	160.5	162.2	58	22.5153	4
3	2	60				2	12.8984	160.5	162.2	58	22.5153	4
4	2	1	199.637	17.254	98.5294	2	13.8101	162.5	161	59.3	22.4568	5
4	2	2	284.474	95.9713	106.142	2	13.8101	162.5	161	59.3	22.4568	5
4	2	3	264.814	113.354	88.6273	2	13.8101	162.5	161	59.3	22.4568	5
4	2	4	122.119	56.4139	98.5688	2	13.8101	162.5	161	59.3	22.4568	5
4	2	5	64.6418	95.4254	127.067	2	13.8101	162.5	161	59.3	22.4568	5
4	2	6	68.6132	102.166	82.8827	2	13.8101	162.5	161	59.3	22.4568	5
4	2	7	73.623	102.166	129.918	2	13.8101	162.5	161	59.3	22.4568	5
4	2	8	76.3289	114.742	96.4569	2	13.8101	162.5	161	59.3	22.4568	5
4	2	9	168.759	46.5009	64.8845	2	13.8101	162.5	161	59.3	22.4568	5
4	2	10	209.07	57.7821	35.6051	2	13.8101	162.5	161	59.3	22.4568	5
4	2	11	223.451	37.8885	91.2029	2	13.8101	162.5	161	59.3	22.4568	5
4	2	12	299.735	45.2063	206.51	2	13.8101	162.5	161	59.3	22.4568	5
4	2	13	278.375	114.851	161.813	2	13.8101	162.5	161	59.3	22.4568	5
4	2	14	209.639	43.6406	81.2267	2	13.8101	162.5	161	59.3	22.4568	5
4	2	15	219.718	36.6895	41.9605	2	13.8101	162.5	161	59.3	22.4568	5
4	2	16	74.6877	6.46607	9.50789	2	13.8101	162.5	161	59.3	22.4568	5
4	2	17	51.9562	80.6221	128.201	2	13.8101	162.5	161	59.3	22.4568	5
4	2	18	82.0684	98.798	123.119	2	13.8101	162.5	161	59.3	22.4568	5
4	2	19	87.0014	81.9688	59.0122	2	13.8101	162.5	161	59.3	22.4568	5
4	2	20	101.218	21.0205	22.2032	2	13.8101	162.5	161	59.3	22.4568	5
4	2	21	99.5454	44.9027	110.668	2	13.8101	162.5	161	59.3	22.4568	5
4	2	22	74.2748	44.9027	92.8029	2	13.8101	162.5	161	59.3	22.4568	5
4	2	23	150.424	61.6345	18	2	13.8101	162.5	161	59.3	22.4568	5
4	2	24	277.326	63.3141	101.072	2	13.8101	162.5	161	59.3	22.4568	5
4	2	25	281.222	74.9533	32.1012	2	13.8101	162.5	161	59.3	22.4568	5
4	2	26	156.045	53.4694	61.0379	2	13.8101	162.5	161	59.3	22.4568	5
4	2	27	160.401	43.831	62.3	2	13.8101	162.5	161	59.3	22.4568	5
4	2	28	101.05	156.758	74.3898	2	13.8101	162.5	161	59.3	22.4568	5
4	2	29	66.4118	132.947	86.5257	2	13.8101	162.5	161	59.3	22.4568	5
4	2	30	56.7523	181.336	63.5814	2	13.8101	162.5	161	59.3	22.4568	5
4	2	31	86.2812	92.665	91.6548	2	13.8101	162.5	161	59.3	22.4568	5
4	2	32	85.8644	101.467	73	2	13.8101	162.5	161	59.3	22.4568	5
4	2	33	99.5454	182.193	83.806	2	13.8101	162.5	161	59.3	22.4568	5
4	2	34	105.809	221.076	96.1121	2	13.8101	162.5	161	59.3	22.4568	5
4	2	35	207.523	112.716	51.5163	2	13.8101	162.5	161	59.3	22.4568	5
4	2	36	450.364	51.0816	80.4593	2	13.8101	162.5	161	59.3	22.4568	5
4	2	37	317.375	102.111	39.3102	2	13.8101	162.5	161	59.3	22.4568	5
4	2	38	427.988	149.626	35.9313	2	13.8101	162.5	161	59.3	22.4568	5
4	2	39	409.318	186.267	112.606	2	13.8101	162.5	161	59.3	22.4568	5
4	2	40	112.062	214.511	208.076	2	13.8101	162.5	161	59.3	22.4568	5
4	2	41	159.659	197.123	181.104	2	13.8101	162.5	161	59.3	22.4568	5
4	2	42	202.152	257.383	361.466	2	13.8101	162.5	161	59.3	22.4568	5
4	2	43	331.687	121.205	75.3448	2	13.8101	162.5	161	59.3	22.4568	5
4	2	44	242.315	63.5182	37.4553	2	13.8101	162.5	161	59.3	22.4568	5
4	2	45	81.7683	101.641	137.674	2	13.8101	162.5	161	59.3	22.4568	5
4	2	46	64.3884	153.5	149.598	2	13.8101	162.5	161	59.3	22.4568	5
4	2	47	80.728	84.2213	52.8777	2	13.8101	162.5	161	59.3	22.4568	5
4	2	48	87.3124	78.1313	37.8885	2	13.8101	162.5	161	59.3	22.4568	5
4	2	49	204.13	94.0938	91.8761	2	13.8101	162.5	161	59.3	22.4568	5
4	2	50	233.873	94.72	59.3528	2	13.8101	162.5	161	59.3	22.4568	5
4	2	51	299.735	78.5968	962.37	2	13.8101	162.5	161	59.3	22.4568	5
4	2	52	280.703	123.612		2	13.8101	162.5	161	59.3	22.4568	5
4	2	53	176.15			2	13.8101	162.5	161	59.3	22.4568	5
4	2	54	55.7819			2	13.8101	162.5	161	59.3	22.4568	5
4	2	55	54.5913			2	13.8101	162.5	161	59.3	22.4568	5
4	2	56	876.654			2	13.8101	162.5	161	59.3	22.4568	5
4	2	57				2	13.8101	162.5	161	59.3	22.4568	5
4	2	58				2	13.8101	162.5	161	59.3	22.4568	5
4	2	59				2	13.8101	162.5	161	59.3	22.4568	5
4	2	60				2	13.8101	162.5	161	59.3	22.4568	5
5	2	1	183.146	31.8987	66.9672	1	13.5171	163.5	165.3	60.2	22.5196	5
5	2	2	216.185	25.0266	43.2863	1	13.5171	163.5	165.3	60.2	22.5196	5
5	2	3	115.81	14.9486	62.1547	1	13.5171	163.5	165.3	60.2	22.5196	5
5	2	4	55.7819	52.4061	137.674	1	13.5171	163.5	165.3	60.2	22.5196	5
5	2	5	155.869	150.485	61.4352	1	13.5171	163.5	165.3	60.2	22.5196	5
5	2	6	236.593	56.1239	27.044	1	13.5171	163.5	165.3	60.2	22.5196	5
5	2	7	254.958	56.5703	134.254	1	13.5171	163.5	165.3	60.2	22.5196	5
5	2	8	154.605	88.8444	158.494	1	13.5171	163.5	165.3	60.2	22.5196	5
5	2	9	63.448	73.2694	150.77	1	13.5171	163.5	165.3	60.2	22.5196	5
5	2	10	111.142	31.2746	143.917	1	13.5171	163.5	165.3	60.2	22.5196	5
5	2	11	162.466	55.6369	69.8058	1	13.5171	163.5	165.3	60.2	22.5196	5
5	2	12	284.305	58.8221	51.4992	1	13.5171	163.5	165.3	60.2	22.5196	5
5	2	13	96.2522	77.4443	61.7326	1	13.5171	163.5	165.3	60.2	22.5196	5
5	2	14	106.337	109.257	50.0128	1	13.5171	163.5	165.3	60.2	22.5196	5
5	2	15	124.591	36.6481	45.8939	1	13.5171	163.5	165.3	60.2	22.5196	5
5	2	16	132.022	47.8987	23.7034	1	13.5171	163.5	165.3	60.2	22.5196	5
5	2	17	52.3562	91.8761	40.4827	1	13.5171	163.5	165.3	60.2	22.5196	5
5	2	18	58.503	120.094	60.6331	1	13.5171	163.5	165.3	60.2	22.5196	5
5	2	19	92.443	27.012	114.552	1	13.5171	163.5	165.3	60.2	22.5196	5
5	2	20	76.0805	27.012	256.131	1	13.5171	163.5	165.3	60.2	22.5196	5
5	2	21	46.4123	22.3886	168.18	1	13.5171	163.5	165.3	60.2	22.5196	5
5	2	22	80.4593	27.0185	135.2	1	13.5171	163.5	165.3	60.2	22.5196	5
5	2	23	99.0207	35.8699	251.64	1	13.5171	163.5	165.3	60.2	22.5196	5
5	2	24	106.329	25.8258	255.175	1	13.5171	163.5	165.3	60.2	22.5196	5
5	2	25	313.516	64.7793	174.032	1	13.5171	163.5	165.3	60.2	22.5196	5
5	2	26	278.237	94.0938	76.7256	1	13.5171	163.5	165.3	60.2	22.5196	5
5	2	27	192.322	94.2669	29.4593	1	13.5171	163.5	165.3	60.2	22.5196	5
5	2	28	192.322	67.5781	58.4059	1	13.5171	163.5	165.3	60.2	22.5196	5
5	2	29	77.2528	134.254	150.485	1	13.5171	163.5	165.3	60.2	22.5196	5
5	2	30	107.804	188.248	182.973	1	13.5171	163.5	165.3	60.2	22.5196	5
5	2	31	114.975	99.8211	138.682	1	13.5171	163.5	165.3	60.2	22.5196	5
5	2	32	292.128	47.8987	105.318	1	13.5171	163.5	165.3	60.2	22.5196	5
5	2	33	163.577	87.5403	156.758	1	13.5171	163.5	165.3	60.2	22.5196	5
5	2	34	121.749	106.886	191.108	1	13.5171	163.5	165.3	60.2	22.5196	5
5	2	35	130.485	97.5975	85.5937	1	13.5171	163.5	165.3	60.2	22.5196	5
5	2	36	233.591	180.284	66.765	1	13.5171	163.5	165.3	60.2	22.5196	5
5	2	37	303.654	120.094	58.9211	1	13.5171	163.5	165.3	60.2	22.5196	5
5	2	38	365.437	73.7621	51.7706	1	13.5171	163.5	165.3	60.2	22.5196	5
5	2	39	307.76	66.9672	35.6721	1	13.5171	163.5	165.3	60.2	22.5196	5
5	2	40	137.788	72.8632	58.9085	1	13.5171	163.5	165.3	60.2	22.5196	5
5	2	41	128.554	51.8683	164.602	1	13.5171	163.5	165.3	60.2	22.5196	5
5	2	42	128.554	54.4898	270.706	1	13.5171	163.5	165.3	60.2	22.5196	5
5	2	43	102.368	115.033	207.508	1	13.5171	163.5	165.3	60.2	22.5196	5
5	2	44	48.6121	180.293	137.796	1	13.5171	163.5	165.3	60.2	22.5196	5
5	2	45	56.5106	88.3179	92.065	1	13.5171	163.5	165.3	60.2	22.5196	5
5	2	46	78.7102	52.2716	8.86002	1	13.5171	163.5	165.3	60.2	22.5196	5
5	2	47	116.553	73.7621	31.4302	1	13.5171	163.5	165.3	60.2	22.5196	5
5	2	48	155.013	110.981	51.5163	1	13.5171	163.5	165.3	60.2	22.5196	5
5	2	49	145.429	114.836	51.9866	1	13.5171	163.5	165.3	60.2	22.5196	5
5	2	50	167.915	64.6797	49.946	1	13.5171	163.5	165.3	60.2	22.5196	5
5	2	51	204.858	115.216	9.83514	1	13.5171	163.5	165.3	60.2	22.5196	5
5	2	52	257.524	120.28	23.8648	1	13.5171	163.5	165.3	60.2	22.5196	5
5	2	53	2877.59	71.6843		1	13.5171	163.5	165.3	60.2	22.5196	5
5	2	54	2314	64.4492		1	13.5171	163.5	165.3	60.2	22.5196	5
5	2	55	150.036			1	13.5171	163.5	165.3	60.2	22.5196	5
5	2	56	126			1	13.5171	163.5	165.3	60.2	22.5196	5
5	2	57				1	13.5171	163.5	165.3	60.2	22.5196	5
5	2	58				1	13.5171	163.5	165.3	60.2	22.5196	5
5	2	59				1	13.5171	163.5	165.3	60.2	22.5196	5
5	2	60				1	13.5171	163.5	165.3	60.2	22.5196	5
6	2	1	123.138	35.555	80.1901	1	13.1311	158.5	159	60.5	24.0822	7
6	2	2	220.287	108.171	142.843	1	13.1311	158.5	159	60.5	24.0822	7
6	2	3	414.719	120.094	165.041	1	13.1311	158.5	159	60.5	24.0822	7
6	2	4	350.055	65.0932	96.6363	1	13.1311	158.5	159	60.5	24.0822	7
6	2	5	278.633	45.117	100.221	1	13.1311	158.5	159	60.5	24.0822	7
6	2	6	187.702	37.4553	74.9417	1	13.1311	158.5	159	60.5	24.0822	7
6	2	7	95.9713	37.8885	61.3901	1	13.1311	158.5	159	60.5	24.0822	7
6	2	8	79.0282	199.805	117.946	1	13.1311	158.5	159	60.5	24.0822	7
6	2	9	81.3488	101.374	146.505	1	13.1311	158.5	159	60.5	24.0822	7
6	2	10	109.979	75.3404	209.46	1	13.1311	158.5	159	60.5	24.0822	7
6	2	11	291.076	92.2436	206.636	1	13.1311	158.5	159	60.5	24.0822	7
6	2	12	477.794	103.917	158.216	1	13.1311	158.5	159	60.5	24.0822	7
6	2	13	551.578	86.4824	109.063	1	13.1311	158.5	159	60.5	24.0822	7
6	2	14	599.037	254.958	102.111	1	13.1311	158.5	159	60.5	24.0822	7
6	2	15	581.008	237.114	95.8629	1	13.1311	158.5	159	60.5	24.0822	7
6	2	16	489.632	114.772	90.4613	1	13.1311	158.5	159	60.5	24.0822	7
6	2	17	346.621	53.7848	52.3562	1	13.1311	158.5	159	60.5	24.0822	7
6	2	18	263.31	39.7458	4.11947	1	13.1311	158.5	159	60.5	24.0822	7
6	2	19	127.831	63.6805	29.8101	1	13.1311	158.5	159	60.5	24.0822	7
6	2	20	529.12	153.5	72.2601	1	13.1311	158.5	159	60.5	24.0822	7
6	2	21	255.707	74.8054	123.842	1	13.1311	158.5	159	60.5	24.0822	7
6	2	22	276.401	40.4145	174.032	1	13.1311	158.5	159	60.5	24.0822	7
6	2	23	240.444	38.8851	71.79	1	13.1311	158.5	159	60.5	24.0822	7
6	2	24	207.134	61.0451	98.2284	1	13.1311	158.5	159	60.5	24.0822	7
6	2	25	208.241	76.0342	112.251	1	13.1311	158.5	159	60.5	24.0822	7
6	2	26	86.0833	66.0462	36.5776	1	13.1311	158.5	159	60.5	24.0822	7
6	2	27	116.562	69.2939	6.46607	1	13.1311	158.5	159	60.5	24.0822	7
6	2	28	108.846	75.8657	26.4579	1	13.1311	158.5	159	60.5	24.0822	7
6	2	29	47.5016	61.7326	100.012	1	13.1311	158.5	159	60.5	24.0822	7
6	2	30	99.2367	106.912	152.292	1	13.1311	158.5	159	60.5	24.0822	7
6	2	31	227.803	162.199	116.941	1	13.1311	158.5	159	60.5	24.0822	7
6	2	32	164.072	122.326	36.5776	1	13.1311	158.5	159	60.5	24.0822	7
6	2	33	112.816	109.171	20.5922	1	13.1311	158.5	159	60.5	24.0822	7
6	2	34	72.6529	160.839	20.3273	1	13.1311	158.5	159	60.5	24.0822	7
6	2	35	63.9806	62.361	29.7955	1	13.1311	158.5	159	60.5	24.0822	7
6	2	36	207.449	30.2597	21.445	1	13.1311	158.5	159	60.5	24.0822	7
6	2	37	274.379	103.257	57.5128	1	13.1311	158.5	159	60.5	24.0822	7
6	2	38	234.012	187.954	55.7781	1	13.1311	158.5	159	60.5	24.0822	7
6	2	39	219.691	34.6808	30.7703	1	13.1311	158.5	159	60.5	24.0822	7
6	2	40	152.114	33.7503	15.142	1	13.1311	158.5	159	60.5	24.0822	7
6	2	41	206.051	98.2733	74.7961	1	13.1311	158.5	159	60.5	24.0822	7
6	2	42	101.014	60.3172	72.9261	1	13.1311	158.5	159	60.5	24.0822	7
6	2	43	47.2827	64.4492	56.9254	1	13.1311	158.5	159	60.5	24.0822	7
6	2	44	57.244	98.3745	51.1863	1	13.1311	158.5	159	60.5	24.0822	7
6	2	45	64.6877	55.8299	63.6402	1	13.1311	158.5	159	60.5	24.0822	7
6	2	46	66.341	92.7087	70.7028	1	13.1311	158.5	159	60.5	24.0822	7
6	2	47	99.5736	118.433	81.3089	1	13.1311	158.5	159	60.5	24.0822	7
6	2	48	174.544	59.9791	64.2244	1	13.1311	158.5	159	60.5	24.0822	7
6	2	49	300.04	41.512	22.3618	1	13.1311	158.5	159	60.5	24.0822	7
6	2	50	272.862	39.538	45.2383	1	13.1311	158.5	159	60.5	24.0822	7
6	2	51	226.693	60.5345	72.8666	1	13.1311	158.5	159	60.5	24.0822	7
6	2	52	260.816	87.8722	155.244	1	13.1311	158.5	159	60.5	24.0822	7
6	2	53	821.26	13.0801	140.281	1	13.1311	158.5	159	60.5	24.0822	7
6	2	54		57.0473	26.4579	1	13.1311	158.5	159	60.5	24.0822	7
6	2	55		59.3933	43.8919	1	13.1311	158.5	159	60.5	24.0822	7
6	2	56			42.2064	1	13.1311	158.5	159	60.5	24.0822	7
6	2	57				1	13.1311	158.5	159	60.5	24.0822	7
6	2	58				1	13.1311	158.5	159	60.5	24.0822	7
6	2	59				1	13.1311	158.5	159	60.5	24.0822	7
6	2	60				1	13.1311	158.5	159	60.5	24.0822	7
7	2	1	231.823	91.2029	180.336	1	11.1187	149.3	145.3	50.6	22.7003	3
7	2	2	209.256	96.7512	76.0342	1	11.1187	149.3	145.3	50.6	22.7003	3
7	2	3	365.81	241.496	109.107	1	11.1187	149.3	145.3	50.6	22.7003	3
7	2	4	487.482	169.057	174.032	1	11.1187	149.3	145.3	50.6	22.7003	3
7	2	5	355.369	201.711	219.718	1	11.1187	149.3	145.3	50.6	22.7003	3
7	2	6	172.133	115.344	134.36	1	11.1187	149.3	145.3	50.6	22.7003	3
7	2	7	212.799	6.46607	132.947	1	11.1187	149.3	145.3	50.6	22.7003	3
7	2	8	286.061	101.072	153.411	1	11.1187	149.3	145.3	50.6	22.7003	3
7	2	9	322.849	124.878	120.027	1	11.1187	149.3	145.3	50.6	22.7003	3
7	2	10	278.633	53.9337	106.962	1	11.1187	149.3	145.3	50.6	22.7003	3
7	2	11	340.034	94.2669	125.985	1	11.1187	149.3	145.3	50.6	22.7003	3
7	2	12	290.468	159.209	119.815	1	11.1187	149.3	145.3	50.6	22.7003	3
7	2	13	170.202	261.635	44.7219	1	11.1187	149.3	145.3	50.6	22.7003	3
7	2	14	174.359	72.9784	90.7106	1	11.1187	149.3	145.3	50.6	22.7003	3
7	2	15	229.851	33.1157	209.071	1	11.1187	149.3	145.3	50.6	22.7003	3
7	2	16	282.904	188.308	212.68	1	11.1187	149.3	145.3	50.6	22.7003	3
7	2	17	321.635	43.764	43.8919	1	11.1187	149.3	145.3	50.6	22.7003	3
7	2	18	276.689	65.0932	23.461	1	11.1187	149.3	145.3	50.6	22.7003	3
7	2	19	63.6805	80.0823	53.7848	1	11.1187	149.3	145.3	50.6	22.7003	3
7	2	20	13.0801	52.1216	131.52	1	11.1187	149.3	145.3	50.6	22.7003	3
7	2	21	27.4089	100.012	203.103	1	11.1187	149.3	145.3	50.6	22.7003	3
7	2	22	286.997	95.2043	99.5191	1	11.1187	149.3	145.3	50.6	22.7003	3
7	2	23	299.555	109.746	13.7612	1	11.1187	149.3	145.3	50.6	22.7003	3
7	2	24	124.801	123.603	29.5926	1	11.1187	149.3	145.3	50.6	22.7003	3
7	2	25	47.8402	110.326	25.9942	1	11.1187	149.3	145.3	50.6	22.7003	3
7	2	26	72.8962	69.0974	24.3016	1	11.1187	149.3	145.3	50.6	22.7003	3
7	2	27	77.6338	40.805	9.83514	1	11.1187	149.3	145.3	50.6	22.7003	3
7	2	28	195.938	87.4301	47.8987	1	11.1187	149.3	145.3	50.6	22.7003	3
7	2	29	335.173	154.083	125.747	1	11.1187	149.3	145.3	50.6	22.7003	3
7	2	30	341.348	168.068	51.42	1	11.1187	149.3	145.3	50.6	22.7003	3
7	2	31	273.29	191.997	53.4694	1	11.1187	149.3	145.3	50.6	22.7003	3
7	2	32	319.228	206.331	54.5	1	11.1187	149.3	145.3	50.6	22.7003	3
7	2	33	134.923	61.247	57.1707	1	11.1187	149.3	145.3	50.6	22.7003	3
7	2	34	66.0462	163.831	44.2191	1	11.1187	149.3	145.3	50.6	22.7003	3
7	2	35	177.658	24.9425	60.0753	1	11.1187	149.3	145.3	50.6	22.7003	3
7	2	36	84.0282	97.8493	75.3404	1	11.1187	149.3	145.3	50.6	22.7003	3
7	2	37	141.291	121.62	116.083	1	11.1187	149.3	145.3	50.6	22.7003	3
7	2	38	81.9303	120.316	158.064	1	11.1187	149.3	145.3	50.6	22.7003	3
7	2	39	217.51	94.6303	129.965	1	11.1187	149.3	145.3	50.6	22.7003	3
7	2	40	226.977	61.7326	91.2774	1	11.1187	149.3	145.3	50.6	22.7003	3
7	2	41	235.194	42.1038	54.0404	1	11.1187	149.3	145.3	50.6	22.7003	3
7	2	42	179.701	35.7246	54.1192	1	11.1187	149.3	145.3	50.6	22.7003	3
7	2	43	100.074	125.747	46.2576	1	11.1187	149.3	145.3	50.6	22.7003	3
7	2	44	104.381	77.3995	85.8445	1	11.1187	149.3	145.3	50.6	22.7003	3
7	2	45	134.386	71.9801	62.3	1	11.1187	149.3	145.3	50.6	22.7003	3
7	2	46	141.253	111.338	60.3182	1	11.1187	149.3	145.3	50.6	22.7003	3
7	2	47	87.6393	58.4059	55.2849	1	11.1187	149.3	145.3	50.6	22.7003	3
7	2	48	95.4929	82.662	58.9211	1	11.1187	149.3	145.3	50.6	22.7003	3
7	2	49	99.3515	42.0773	22.1145	1	11.1187	149.3	145.3	50.6	22.7003	3
7	2	50	129.63	55.0568	42.737	1	11.1187	149.3	145.3	50.6	22.7003	3
7	2	51	262.322	51.3749	96.7397	1	11.1187	149.3	145.3	50.6	22.7003	3
7	2	52	167.104	66.4118	104.914	1	11.1187	149.3	145.3	50.6	22.7003	3
7	2	53	120.719	90.5249	98.798	1	11.1187	149.3	145.3	50.6	22.7003	3
7	2	54		57.0473	62.1547	1	11.1187	149.3	145.3	50.6	22.7003	3
7	2	55			18.2483	1	11.1187	149.3	145.3	50.6	22.7003	3
7	2	56			36.5776	1	11.1187	149.3	145.3	50.6	22.7003	3
7	2	57				1	11.1187	149.3	145.3	50.6	22.7003	3
7	2	58				1	11.1187	149.3	145.3	50.6	22.7003	3
7	2	59				1	11.1187	149.3	145.3	50.6	22.7003	3
7	2	60				1	11.1187	149.3	145.3	50.6	22.7003	3
8	2	1	87.3267	83.6909	71.6843	1	13.3611	161.6	157.9	59.4	22.7459	4
8	2	2	76.7441	109.348	11.3772	1	13.3611	161.6	157.9	59.4	22.7459	4
8	2	3	90.3466	27.4089	99.4749	1	13.3611	161.6	157.9	59.4	22.7459	4
8	2	4	222.321	41.2292	140.281	1	13.3611	161.6	157.9	59.4	22.7459	4
8	2	5	235.647	174.78	182.608	1	13.3611	161.6	157.9	59.4	22.7459	4
8	2	6	205.476	57.6147	141.999	1	13.3611	161.6	157.9	59.4	22.7459	4
8	2	7	126.193	123.099	53.3205	1	13.3611	161.6	157.9	59.4	22.7459	4
8	2	8	100.454	68.3769	42.4408	1	13.3611	161.6	157.9	59.4	22.7459	4
8	2	9	234.135	30.2597	77.2032	1	13.3611	161.6	157.9	59.4	22.7459	4
8	2	10	201.776	43.1975	125.985	1	13.3611	161.6	157.9	59.4	22.7459	4
8	2	11	72.8083	20.3708	131.52	1	13.3611	161.6	157.9	59.4	22.7459	4
8	2	12	109.746	23.2648	142.986	1	13.3611	161.6	157.9	59.4	22.7459	4
8	2	13	336.509	62.9408	254.692	1	13.3611	161.6	157.9	59.4	22.7459	4
8	2	14	298.683	158.384	307.365	1	13.3611	161.6	157.9	59.4	22.7459	4
8	2	15	211.522	112.357	64.7105	1	13.3611	161.6	157.9	59.4	22.7459	4
8	2	16	101.583	124.129	74.0072	1	13.3611	161.6	157.9	59.4	22.7459	4
8	2	17	97.3711	204.576	72.9784	1	13.3611	161.6	157.9	59.4	22.7459	4
8	2	18	100.012	201.704	69.9824	1	13.3611	161.6	157.9	59.4	22.7459	4
8	2	19	123.456	73.2694	106.192	1	13.3611	161.6	157.9	59.4	22.7459	4
8	2	20	76.1111	107.119	180.537	1	13.3611	161.6	157.9	59.4	22.7459	4
8	2	21	85.8492	202.738	186.763	1	13.3611	161.6	157.9	59.4	22.7459	4
8	2	22	84.224	228.981	93.4604	1	13.3611	161.6	157.9	59.4	22.7459	4
8	2	23	128.6	284.305	9.50474	1	13.3611	161.6	157.9	59.4	22.7459	4
8	2	24	301.968	299.555	156.758	1	13.3611	161.6	157.9	59.4	22.7459	4
8	2	25	258.282	209.875	116.941	1	13.3611	161.6	157.9	59.4	22.7459	4
8	2	26	262.975	242.589	162.352	1	13.3611	161.6	157.9	59.4	22.7459	4
8	2	27	277.32	52.2009	203.49	1	13.3611	161.6	157.9	59.4	22.7459	4
8	2	28	220.316	178.206	290.344	1	13.3611	161.6	157.9	59.4	22.7459	4
8	2	29	210.752	225.303	93.0975	1	13.3611	161.6	157.9	59.4	22.7459	4
8	2	30	229.745	80.7967	68.3468	1	13.3611	161.6	157.9	59.4	22.7459	4
8	2	31	263.685	56.0121	53.4958	1	13.3611	161.6	157.9	59.4	22.7459	4
8	2	32	321.507	197.882	19.7732	1	13.3611	161.6	157.9	59.4	22.7459	4
8	2	33	474.088	64.7793	86.9904	1	13.3611	161.6	157.9	59.4	22.7459	4
8	2	34	497.597	123.525	120.094	1	13.3611	161.6	157.9	59.4	22.7459	4
8	2	35	553.462	235.964	89.0297	1	13.3611	161.6	157.9	59.4	22.7459	4
8	2	36	510.549	271.207	34.4988	1	13.3611	161.6	157.9	59.4	22.7459	4
8	2	37	535.38	170.64	93.1303	1	13.3611	161.6	157.9	59.4	22.7459	4
8	2	38	433.572	232.866	100.535	1	13.3611	161.6	157.9	59.4	22.7459	4
8	2	39	327.802	56.4139	31.2746	1	13.3611	161.6	157.9	59.4	22.7459	4
8	2	40	398.116	100.141	66.0462	1	13.3611	161.6	157.9	59.4	22.7459	4
8	2	41	376.761	166.725	26.1228	1	13.3611	161.6	157.9	59.4	22.7459	4
8	2	42	179.635	41.3769	31.9453	1	13.3611	161.6	157.9	59.4	22.7459	4
8	2	43	88.6273	163.206	45.6968	1	13.3611	161.6	157.9	59.4	22.7459	4
8	2	44	81.7683	204.091	60.0753	1	13.3611	161.6	157.9	59.4	22.7459	4
8	2	45	131.977	122.05	133.616	1	13.3611	161.6	157.9	59.4	22.7459	4
8	2	46	313.038	120.682	30.7148	1	13.3611	161.6	157.9	59.4	22.7459	4
8	2	47	332.499	83.7908	99.3936	1	13.3611	161.6	157.9	59.4	22.7459	4
8	2	48	202.385	95.4254	108.205	1	13.3611	161.6	157.9	59.4	22.7459	4
8	2	49	141.197	145.754	84.3499	1	13.3611	161.6	157.9	59.4	22.7459	4
8	2	50	145.847	137.389	112.816	1	13.3611	161.6	157.9	59.4	22.7459	4
8	2	51	988.566	183.001	139.81	1	13.3611	161.6	157.9	59.4	22.7459	4
8	2	52	978.71	124.878	209.874	1	13.3611	161.6	157.9	59.4	22.7459	4
8	2	53	863.756	78.5968	205.476	1	13.3611	161.6	157.9	59.4	22.7459	4
8	2	54	648.253	145.162	146.626	1	13.3611	161.6	157.9	59.4	22.7459	4
8	2	55		233.873	109.257	1	13.3611	161.6	157.9	59.4	22.7459	4
8	2	56		78.6659		1	13.3611	161.6	157.9	59.4	22.7459	4
8	2	57		125.747		1	13.3611	161.6	157.9	59.4	22.7459	4
8	2	58				1	13.3611	161.6	157.9	59.4	22.7459	4
8	2	59				1	13.3611	161.6	157.9	59.4	22.7459	4
8	2	60				1	13.3611	161.6	157.9	59.4	22.7459	4
9	2	1	103.128	98.0816	110.981	1	12.5287	152.6	155.2	49	21.042	8
9	2	2	139.123	11.7478	24.3016	1	12.5287	152.6	155.2	49	21.042	8
9	2	3	287.685	50.3945	55.6656	1	12.5287	152.6	155.2	49	21.042	8
9	2	4	349.315	54.7691	18.7489	1	12.5287	152.6	155.2	49	21.042	8
9	2	5	393.065	22.3886	30.23	1	12.5287	152.6	155.2	49	21.042	8
9	2	6	399.021	84.7366	93.8929	1	12.5287	152.6	155.2	49	21.042	8
9	2	7	392.188	100.124	120.44	1	12.5287	152.6	155.2	49	21.042	8
9	2	8	292.611	98.8175	88.8444	1	12.5287	152.6	155.2	49	21.042	8
9	2	9	193.484	74.2306	82.7798	1	12.5287	152.6	155.2	49	21.042	8
9	2	10	286.332	57.3371	93.4561	1	12.5287	152.6	155.2	49	21.042	8
9	2	11	316.864	75.3448	85.1469	1	12.5287	152.6	155.2	49	21.042	8
9	2	12	307.569	7.0214	120.277	1	12.5287	152.6	155.2	49	21.042	8
9	2	13	319.369	89.4009	85.9414	1	12.5287	152.6	155.2	49	21.042	8
9	2	14	267.246	94.528	113.304	1	12.5287	152.6	155.2	49	21.042	8
9	2	15	229.745	43.8945	132.004	1	12.5287	152.6	155.2	49	21.042	8
9	2	16	193.569	27.0185	71.5744	1	12.5287	152.6	155.2	49	21.042	8
9	2	17	193.569	45.117	96.2747	1	12.5287	152.6	155.2	49	21.042	8
9	2	18	173.479	61.5705	191.615	1	12.5287	152.6	155.2	49	21.042	8
9	2	19	176.983	24.3016	62.8834	1	12.5287	152.6	155.2	49	21.042	8
9	2	20	233.53	43.0735	43.8945	1	12.5287	152.6	155.2	49	21.042	8
9	2	21	222.755	93.5645	99.8211	1	12.5287	152.6	155.2	49	21.042	8
9	2	22	206.797	27.0187	116.588	1	12.5287	152.6	155.2	49	21.042	8
9	2	23	205.146	29.8101	133.933	1	12.5287	152.6	155.2	49	21.042	8
9	2	24	186.253	68.0943	65.6964	1	12.5287	152.6	155.2	49	21.042	8
9	2	25	166.38	87.3124	54.3472	1	12.5287	152.6	155.2	49	21.042	8
9	2	26	123.375	57.3569	70.5153	1	12.5287	152.6	155.2	49	21.042	8
9	2	27	122.079	79.0282	155.723	1	12.5287	152.6	155.2	49	21.042	8
9	2	28	134.551	68.6376	180.37	1	12.5287	152.6	155.2	49	21.042	8
9	2	29	145.836	61.7326	135.245	1	12.5287	152.6	155.2	49	21.042	8
9	2	30	160.487	59.0122	141.197	1	12.5287	152.6	155.2	49	21.042	8
9	2	31	177.94	59.0122	135.775	1	12.5287	152.6	155.2	49	21.042	8
9	2	32	184.222	34.8827	51.9866	1	12.5287	152.6	155.2	49	21.042	8
9	2	33	213.439	59.3933	136.245	1	12.5287	152.6	155.2	49	21.042	8
9	2	34	256.002	152.328	155.562	1	12.5287	152.6	155.2	49	21.042	8
9	2	35	382.504	141.197	138.928	1	12.5287	152.6	155.2	49	21.042	8
9	2	36	462.049	74.1734	31.2866	1	12.5287	152.6	155.2	49	21.042	8
9	2	37	372.426	79.5727	61.5435	1	12.5287	152.6	155.2	49	21.042	8
9	2	38	303.086	40.5744	84.3294	1	12.5287	152.6	155.2	49	21.042	8
9	2	39	104.976	108.595	33.5179	1	12.5287	152.6	155.2	49	21.042	8
9	2	40	5.85491	71.5744	110.064	1	12.5287	152.6	155.2	49	21.042	8
9	2	41	163.777	109.348	109.979	1	12.5287	152.6	155.2	49	21.042	8
9	2	42	23.461	122.119	99.5736	1	12.5287	152.6	155.2	49	21.042	8
9	2	43	48.9869	69.4184	9.83514	1	12.5287	152.6	155.2	49	21.042	8
9	2	44	187.376	73.3108	105.87	1	12.5287	152.6	155.2	49	21.042	8
9	2	45	187.376	67.309	36.7784	1	12.5287	152.6	155.2	49	21.042	8
9	2	46	234.17	60.5013	180.632	1	12.5287	152.6	155.2	49	21.042	8
9	2	47	265.436	49.7154	188.586	1	12.5287	152.6	155.2	49	21.042	8
9	2	48	163.832	81.3221	40.5572	1	12.5287	152.6	155.2	49	21.042	8
9	2	49	1643.01	116.27	26.4579	1	12.5287	152.6	155.2	49	21.042	8
9	2	50	447.254	115.542	37.3109	1	12.5287	152.6	155.2	49	21.042	8
9	2	51	1001.55	62.444	208.076	1	12.5287	152.6	155.2	49	21.042	8
9	2	52	605.518	22.5417	87.7385	1	12.5287	152.6	155.2	49	21.042	8
9	2	53	920.07	93.5645	160.666	1	12.5287	152.6	155.2	49	21.042	8
9	2	54	977.918	66.1871		1	12.5287	152.6	155.2	49	21.042	8
9	2	55	1124.48	62.8834		1	12.5287	152.6	155.2	49	21.042	8
9	2	56	95.544			1	12.5287	152.6	155.2	49	21.042	8
9	2	57	638.731			1	12.5287	152.6	155.2	49	21.042	8
9	2	58				1	12.5287	152.6	155.2	49	21.042	8
9	2	59				1	12.5287	152.6	155.2	49	21.042	8
9	2	60				1	12.5287	152.6	155.2	49	21.042	8
10	2	1	222.289	112.716	47.5635	2	14.856	174.2	177.3	70.2	23.1335	4
10	2	2	321.188	112.716	70.4162	2	14.856	174.2	177.3	70.2	23.1335	4
10	2	3	418.865	112.716	203.25	2	14.856	174.2	177.3	70.2	23.1335	4
10	2	4	234.533	155.521	227.825	2	14.856	174.2	177.3	70.2	23.1335	4
10	2	5	134.144	206.422	127.746	2	14.856	174.2	177.3	70.2	23.1335	4
10	2	6	79.9826	113.776	77.067	2	14.856	174.2	177.3	70.2	23.1335	4
10	2	7	234.135	141.719	96.7512	2	14.856	174.2	177.3	70.2	23.1335	4
10	2	8	235.013	61.306	39.0493	2	14.856	174.2	177.3	70.2	23.1335	4
10	2	9	147.846	28.4839	56.3881	2	14.856	174.2	177.3	70.2	23.1335	4
10	2	10	77.2894	88.1022	99.3936	2	14.856	174.2	177.3	70.2	23.1335	4
10	2	11	101.518	62.361	74.1918	2	14.856	174.2	177.3	70.2	23.1335	4
10	2	12	215.256	61.7326	86.9904	2	14.856	174.2	177.3	70.2	23.1335	4
10	2	13	188.552	159.209	161.398	2	14.856	174.2	177.3	70.2	23.1335	4
10	2	14	172.474	315.619	87.4443	2	14.856	174.2	177.3	70.2	23.1335	4
10	2	15	137.36	300.764	23.0315	2	14.856	174.2	177.3	70.2	23.1335	4
10	2	16	163.891	206.63	94.0938	2	14.856	174.2	177.3	70.2	23.1335	4
10	2	17	238.228	287.584	168.759	2	14.856	174.2	177.3	70.2	23.1335	4
10	2	18	315.267	220.051	150.106	2	14.856	174.2	177.3	70.2	23.1335	4
10	2	19	491.663	226.95	71.9801	2	14.856	174.2	177.3	70.2	23.1335	4
10	2	20	382.941	302.681	46.6495	2	14.856	174.2	177.3	70.2	23.1335	4
10	2	21	439.504	271.901	109.063	2	14.856	174.2	177.3	70.2	23.1335	4
10	2	22	286.332	258.308	77.7545	2	14.856	174.2	177.3	70.2	23.1335	4
10	2	23	277.459	244.118	77.2365	2	14.856	174.2	177.3	70.2	23.1335	4
10	2	24	208.453	188.865	109.063	2	14.856	174.2	177.3	70.2	23.1335	4
10	2	25	248.933	73.7621	165.966	2	14.856	174.2	177.3	70.2	23.1335	4
10	2	26	255.57	201.074	169.972	2	14.856	174.2	177.3	70.2	23.1335	4
10	2	27	206.051	101.518	123.582	2	14.856	174.2	177.3	70.2	23.1335	4
10	2	28	196.506	125.021	98.1726	2	14.856	174.2	177.3	70.2	23.1335	4
10	2	29	140.735	96.4052	55.3138	2	14.856	174.2	177.3	70.2	23.1335	4
10	2	30	106.73	148.597	44.3813	2	14.856	174.2	177.3	70.2	23.1335	4
10	2	31	332.993	38.2873	56.7523	2	14.856	174.2	177.3	70.2	23.1335	4
10	2	32	238.78	116.27	80.1901	2	14.856	174.2	177.3	70.2	23.1335	4
10	2	33	301.057	24.4364	64.6877	2	14.856	174.2	177.3	70.2	23.1335	4
10	2	34	832.689	64.1112	47.8257	2	14.856	174.2	177.3	70.2	23.1335	4
10	2	35	545.798	125.747	88.4699	2	14.856	174.2	177.3	70.2	23.1335	4
10	2	36	192.008	54.4898	45.117	2	14.856	174.2	177.3	70.2	23.1335	4
10	2	37	574.524	94.6119	73.2694	2	14.856	174.2	177.3	70.2	23.1335	4
10	2	38	458.242	124.401	25.0266	2	14.856	174.2	177.3	70.2	23.1335	4
10	2	39	281.194	179.84	97.6729	2	14.856	174.2	177.3	70.2	23.1335	4
10	2	40	350.688	118.838	136.297	2	14.856	174.2	177.3	70.2	23.1335	4
10	2	41	362.764	84.9061	145.424	2	14.856	174.2	177.3	70.2	23.1335	4
10	2	42	438.008	103.702	270.818	2	14.856	174.2	177.3	70.2	23.1335	4
10	2	43	532.511	107.555	180.632	2	14.856	174.2	177.3	70.2	23.1335	4
10	2	44	526.325	96.774	155.696	2	14.856	174.2	177.3	70.2	23.1335	4
10	2	45	61.247	63.3141	107.046	2	14.856	174.2	177.3	70.2	23.1335	4
10	2	46	99.2367	69.0395	178.776	2	14.856	174.2	177.3	70.2	23.1335	4
10	2	47	246.585	42.0773	249.2	2	14.856	174.2	177.3	70.2	23.1335	4
10	2	48	137.667	76.6877	227.391	2	14.856	174.2	177.3	70.2	23.1335	4
10	2	49	201.467		219.718	2	14.856	174.2	177.3	70.2	23.1335	4
10	2	50	226.079		199.709	2	14.856	174.2	177.3	70.2	23.1335	4
10	2	51	109.257		159.701	2	14.856	174.2	177.3	70.2	23.1335	4
10	2	52	140.06		249.2	2	14.856	174.2	177.3	70.2	23.1335	4
10	2	53	251.545		115.542	2	14.856	174.2	177.3	70.2	23.1335	4
10	2	54	1199.11		93.2194	2	14.856	174.2	177.3	70.2	23.1335	4
10	2	55	610.01		115.735	2	14.856	174.2	177.3	70.2	23.1335	4
10	2	56	1636.97			2	14.856	174.2	177.3	70.2	23.1335	4
10	2	57	1647.19			2	14.856	174.2	177.3	70.2	23.1335	4
10	2	58	115.741			2	14.856	174.2	177.3	70.2	23.1335	4
10	2	59				2	14.856	174.2	177.3	70.2	23.1335	4
10	2	60				2	14.856	174.2	177.3	70.2	23.1335	4
11	3	1	331.624	101.641	146.992	1	11.9291	157.3	159.8	52.4	21.1775	8
11	3	2	270.328	110.57	185.652	1	11.9291	157.3	159.8	52.4	21.1775	8
11	3	3	233.325	23.1138	400.22	1	11.9291	157.3	159.8	52.4	21.1775	8
11	3	4	303.142	53.7582	258.988	1	11.9291	157.3	159.8	52.4	21.1775	8
11	3	5	296.453	57.3791	241.276	1	11.9291	157.3	159.8	52.4	21.1775	8
11	3	6	83.3235	59.8111	235.184	1	11.9291	157.3	159.8	52.4	21.1775	8
11	3	7	134.661	62.2101	133.64	1	11.9291	157.3	159.8	52.4	21.1775	8
11	3	8	213.258	65.7198	162.781	1	11.9291	157.3	159.8	52.4	21.1775	8
11	3	9	183.339	55.2782	122.548	1	11.9291	157.3	159.8	52.4	21.1775	8
11	3	10	109.658	30.2597	89.8246	1	11.9291	157.3	159.8	52.4	21.1775	8
11	3	11	140.673	61.4352	72.9261	1	11.9291	157.3	159.8	52.4	21.1775	8
11	3	12	98.0816	143.983	20.4619	1	11.9291	157.3	159.8	52.4	21.1775	8
11	3	13	329.792	94.72	27.0185	1	11.9291	157.3	159.8	52.4	21.1775	8
11	3	14	281.441	89.9142	26.8069	1	11.9291	157.3	159.8	52.4	21.1775	8
11	3	15	317.111	99.6885	46.9988	1	11.9291	157.3	159.8	52.4	21.1775	8
11	3	16	206.343	30.2597	67.3617	1	11.9291	157.3	159.8	52.4	21.1775	8
11	3	17	112.206	10.8931	17.6567	1	11.9291	157.3	159.8	52.4	21.1775	8
11	3	18	285.101	149.735	30.8804	1	11.9291	157.3	159.8	52.4	21.1775	8
11	3	19	429.178	172.713	47.6488	1	11.9291	157.3	159.8	52.4	21.1775	8
11	3	20	37.2055	163.492	144.911	1	11.9291	157.3	159.8	52.4	21.1775	8
11	3	21	226.869	69.2939	191.768	1	11.9291	157.3	159.8	52.4	21.1775	8
11	3	22	97.257	103.347	153.563	1	11.9291	157.3	159.8	52.4	21.1775	8
11	3	23	447.116	117.7	114.456	1	11.9291	157.3	159.8	52.4	21.1775	8
11	3	24	270.605	64.2932	67.4645	1	11.9291	157.3	159.8	52.4	21.1775	8
11	3	25	472.711	84.9906	22.4804	1	11.9291	157.3	159.8	52.4	21.1775	8
11	3	26	367.139	78.1369	54.1192	1	11.9291	157.3	159.8	52.4	21.1775	8
11	3	27	261.65	85.9388	249.708	1	11.9291	157.3	159.8	52.4	21.1775	8
11	3	28	271.79	84.9906	174.14	1	11.9291	157.3	159.8	52.4	21.1775	8
11	3	29	235.214	132.725	261.567	1	11.9291	157.3	159.8	52.4	21.1775	8
11	3	30	126.193	120.514	261.567	1	11.9291	157.3	159.8	52.4	21.1775	8
11	3	31	98.1901	49.1159	130.926	1	11.9291	157.3	159.8	52.4	21.1775	8
11	3	32	305.557	61.8945	109.217	1	11.9291	157.3	159.8	52.4	21.1775	8
11	3	33	203.25	61.3538	136.551	1	11.9291	157.3	159.8	52.4	21.1775	8
11	3	34	137.641	143.218	102.303	1	11.9291	157.3	159.8	52.4	21.1775	8
11	3	35	66.0462	112.308	67.4645	1	11.9291	157.3	159.8	52.4	21.1775	8
11	3	36	48.5783	51.9779	58.2416	1	11.9291	157.3	159.8	52.4	21.1775	8
11	3	37	109.956	61.3538	61.5435	1	11.9291	157.3	159.8	52.4	21.1775	8
11	3	38	228.571	103.108	66.5141	1	11.9291	157.3	159.8	52.4	21.1775	8
11	3	39	502.621	166.666	101.641	1	11.9291	157.3	159.8	52.4	21.1775	8
11	3	40	549.321	184.805	331.462	1	11.9291	157.3	159.8	52.4	21.1775	8
11	3	41	156.249	172.918	98.798	1	11.9291	157.3	159.8	52.4	21.1775	8
11	3	42	216.384	201.776	93.3336	1	11.9291	157.3	159.8	52.4	21.1775	8
11	3	43	213.548	79.0142	52.3608	1	11.9291	157.3	159.8	52.4	21.1775	8
11	3	44	201.393	169.331	35.6721	1	11.9291	157.3	159.8	52.4	21.1775	8
11	3	45	233.586	83.6876	41.3769	1	11.9291	157.3	159.8	52.4	21.1775	8
11	3	46	392.143	96.0675	230.683	1	11.9291	157.3	159.8	52.4	21.1775	8
11	3	47	536.503	60.3242	485.35	1	11.9291	157.3	159.8	52.4	21.1775	8
11	3	48	82.239	175.279	438.638	1	11.9291	157.3	159.8	52.4	21.1775	8
11	3	49	224.26	276.968	156.283	1	11.9291	157.3	159.8	52.4	21.1775	8
11	3	50	465.292	299.625	150.445	1	11.9291	157.3	159.8	52.4	21.1775	8
11	3	51	205.476	213.421	139.123	1	11.9291	157.3	159.8	52.4	21.1775	8
11	3	52	145.424	160.251	260.435	1	11.9291	157.3	159.8	52.4	21.1775	8
11	3	53		175.446	220.482	1	11.9291	157.3	159.8	52.4	21.1775	8
11	3	54		109.949	226.869	1	11.9291	157.3	159.8	52.4	21.1775	8
11	3	55		46.5348	272.034	1	11.9291	157.3	159.8	52.4	21.1775	8
11	3	56			39.0959	1	11.9291	157.3	159.8	52.4	21.1775	8
11	3	57			133.492	1	11.9291	157.3	159.8	52.4	21.1775	8
11	3	58			116.584	1	11.9291	157.3	159.8	52.4	21.1775	8
11	3	59				1	11.9291	157.3	159.8	52.4	21.1775	8
11	3	60				1	11.9291	157.3	159.8	52.4	21.1775	8
12	3	1	450.946	74.0072	247.597	1	11.2939	150.6	149.3	44.2	19.4882	3
12	3	2	419.669	57.4611	209.07	1	11.2939	150.6	149.3	44.2	19.4882	3
12	3	3	413.04	71.2234	201.675	1	11.2939	150.6	149.3	44.2	19.4882	3
12	3	4	395.582	75.9655	84.8854	1	11.2939	150.6	149.3	44.2	19.4882	3
12	3	5	322.621	48.2037	204.295	1	11.2939	150.6	149.3	44.2	19.4882	3
12	3	6	309.721	34.5863	138.534	1	11.2939	150.6	149.3	44.2	19.4882	3
12	3	7	277.138	30.8804	123.957	1	11.2939	150.6	149.3	44.2	19.4882	3
12	3	8	257.135	32.6725	196.388	1	11.2939	150.6	149.3	44.2	19.4882	3
12	3	9	253.65	51.0816	254.97	1	11.2939	150.6	149.3	44.2	19.4882	3
12	3	10	252.748	77.067	398.775	1	11.2939	150.6	149.3	44.2	19.4882	3
12	3	11	278.338	126.788	426.455	1	11.2939	150.6	149.3	44.2	19.4882	3
12	3	12	306.74	78.2065	234.863	1	11.2939	150.6	149.3	44.2	19.4882	3
12	3	13	320.762	42.3572	262.344	1	11.2939	150.6	149.3	44.2	19.4882	3
12	3	14	303.372	71.6843	124.063	1	11.2939	150.6	149.3	44.2	19.4882	3
12	3	15	235.698	98.2733	149.477	1	11.2939	150.6	149.3	44.2	19.4882	3
12	3	16	226.602	41.503	127.44	1	11.2939	150.6	149.3	44.2	19.4882	3
12	3	17	195.426	64.0664	37.7139	1	11.2939	150.6	149.3	44.2	19.4882	3
12	3	18	124.025	23.5185	172.872	1	11.2939	150.6	149.3	44.2	19.4882	3
12	3	19	118.781	36.1703	189.557	1	11.2939	150.6	149.3	44.2	19.4882	3
12	3	20	192.354	52.2009	114.851	1	11.2939	150.6	149.3	44.2	19.4882	3
12	3	21	268.209	52.8115	9.53415	1	11.2939	150.6	149.3	44.2	19.4882	3
12	3	22	330.146	180.336	74.9417	1	11.2939	150.6	149.3	44.2	19.4882	3
12	3	23	400.422	226.986	120.027	1	11.2939	150.6	149.3	44.2	19.4882	3
12	3	24	371.339	142.143	80.85	1	11.2939	150.6	149.3	44.2	19.4882	3
12	3	25	190.137	100.522	110.064	1	11.2939	150.6	149.3	44.2	19.4882	3
12	3	26	79.2811	148.065	236.058	1	11.2939	150.6	149.3	44.2	19.4882	3
12	3	27	89.8406	130.318	682.024	1	11.2939	150.6	149.3	44.2	19.4882	3
12	3	28	114.666	86.9147	115.649	1	11.2939	150.6	149.3	44.2	19.4882	3
12	3	29	438.344	92.2436	122.05	1	11.2939	150.6	149.3	44.2	19.4882	3
12	3	30	270.062	79.9358	72.0912	1	11.2939	150.6	149.3	44.2	19.4882	3
12	3	31	233.873	201.039	51.1863	1	11.2939	150.6	149.3	44.2	19.4882	3
12	3	32	112.308	79.4582	128.68	1	11.2939	150.6	149.3	44.2	19.4882	3
12	3	33	48.5721	102.589	126.052	1	11.2939	150.6	149.3	44.2	19.4882	3
12	3	34	51.4782	169.343	95.544	1	11.2939	150.6	149.3	44.2	19.4882	3
12	3	35	46.0888	137.671	176.739	1	11.2939	150.6	149.3	44.2	19.4882	3
12	3	36	151.394	183.248	177.295	1	11.2939	150.6	149.3	44.2	19.4882	3
12	3	37	250.422	128.68	156.068	1	11.2939	150.6	149.3	44.2	19.4882	3
12	3	38	284.488	88.794	204.358	1	11.2939	150.6	149.3	44.2	19.4882	3
12	3	39	212.799	164.659	123.087	1	11.2939	150.6	149.3	44.2	19.4882	3
12	3	40	267.336	323.265	177.942	1	11.2939	150.6	149.3	44.2	19.4882	3
12	3	41	466.631	63.843	104.462	1	11.2939	150.6	149.3	44.2	19.4882	3
12	3	42	553.027	157.274	194.857	1	11.2939	150.6	149.3	44.2	19.4882	3
12	3	43	497.435	191.48	21.7555	1	11.2939	150.6	149.3	44.2	19.4882	3
12	3	44	79.9826	103.592	47.2827	1	11.2939	150.6	149.3	44.2	19.4882	3
12	3	45	81.9183	276.707	77.4773	1	11.2939	150.6	149.3	44.2	19.4882	3
12	3	46	162.75	19.6003	66.9672	1	11.2939	150.6	149.3	44.2	19.4882	3
12	3	47	202.03	73.2765	63.6002	1	11.2939	150.6	149.3	44.2	19.4882	3
12	3	48	238.463	80.6626	179.635	1	11.2939	150.6	149.3	44.2	19.4882	3
12	3	49	288.016	56.2174	186.658	1	11.2939	150.6	149.3	44.2	19.4882	3
12	3	50	274.853	55.2742	246.138	1	11.2939	150.6	149.3	44.2	19.4882	3
12	3	51	287.584	48.5783	163.15	1	11.2939	150.6	149.3	44.2	19.4882	3
12	3	52	315.619	42.2064	47.5588	1	11.2939	150.6	149.3	44.2	19.4882	3
12	3	53	141.522	8.75557	64.8448	1	11.2939	150.6	149.3	44.2	19.4882	3
12	3	54	242.922	60.0111	73.059	1	11.2939	150.6	149.3	44.2	19.4882	3
12	3	55		120.316	118.768	1	11.2939	150.6	149.3	44.2	19.4882	3
12	3	56		150.485	174.375	1	11.2939	150.6	149.3	44.2	19.4882	3
12	3	57			127.421	1	11.2939	150.6	149.3	44.2	19.4882	3
12	3	58			116.584	1	11.2939	150.6	149.3	44.2	19.4882	3
12	3	59				1	11.2939	150.6	149.3	44.2	19.4882	3
12	3	60				1	11.2939	150.6	149.3	44.2	19.4882	3
13	3	1	150.881	57.0312	216.384	1	13.0845	159.6	161.3	54.5	21.3959	4
13	3	2	109.174	41.2292	190.976	1	13.0845	159.6	161.3	54.5	21.3959	4
13	3	3	111.095	76.7753	184.081	1	13.0845	159.6	161.3	54.5	21.3959	4
13	3	4	109.933	186.837	154.691	1	13.0845	159.6	161.3	54.5	21.3959	4
13	3	5	206.289	211.152	154.691	1	13.0845	159.6	161.3	54.5	21.3959	4
13	3	6	291.076	137.322	193.898	1	13.0845	159.6	161.3	54.5	21.3959	4
13	3	7	393.729	101.072	117.133	1	13.0845	159.6	161.3	54.5	21.3959	4
13	3	8	584.705	136.265	313.038	1	13.0845	159.6	161.3	54.5	21.3959	4
13	3	9	578.124	90.4613	402.711	1	13.0845	159.6	161.3	54.5	21.3959	4
13	3	10	392.84	30.3832	155.643	1	13.0845	159.6	161.3	54.5	21.3959	4
13	3	11	255.962	114.445	240.499	1	13.0845	159.6	161.3	54.5	21.3959	4
13	3	12	372.426	110.57	98.0845	1	13.0845	159.6	161.3	54.5	21.3959	4
13	3	13	273.562	83.2181	64.4525	1	13.0845	159.6	161.3	54.5	21.3959	4
13	3	14	253.967	78.8975	20.3708	1	13.0845	159.6	161.3	54.5	21.3959	4
13	3	15	264.97	22.9264	50.8434	1	13.0845	159.6	161.3	54.5	21.3959	4
13	3	16	260.238	56.3881	37.8885	1	13.0845	159.6	161.3	54.5	21.3959	4
13	3	17	232.073	142.843	311.416	1	13.0845	159.6	161.3	54.5	21.3959	4
13	3	18	147.275	175.568	233.78	1	13.0845	159.6	161.3	54.5	21.3959	4
13	3	19	141.821	137.796	320.732	1	13.0845	159.6	161.3	54.5	21.3959	4
13	3	20	123.519	33.3665	113.267	1	13.0845	159.6	161.3	54.5	21.3959	4
13	3	21	126.105	65.9049	173.648	1	13.0845	159.6	161.3	54.5	21.3959	4
13	3	22	223.451	76.0865	78.1468	1	13.0845	159.6	161.3	54.5	21.3959	4
13	3	23	278.433	122.432	30.8457	1	13.0845	159.6	161.3	54.5	21.3959	4
13	3	24	238.921	13.0801	11.3442	1	13.0845	159.6	161.3	54.5	21.3959	4
13	3	25	144.65	67.309	74.0072	1	13.0845	159.6	161.3	54.5	21.3959	4
13	3	26	238.282	57.4144	235.932	1	13.0845	159.6	161.3	54.5	21.3959	4
13	3	27	44.147	34.4988	340.034	1	13.0845	159.6	161.3	54.5	21.3959	4
13	3	28	165.966	34.8174	484.017	1	13.0845	159.6	161.3	54.5	21.3959	4
13	3	29	164.565	62.444	208.67	1	13.0845	159.6	161.3	54.5	21.3959	4
13	3	30	207.508	120.684	197.882	1	13.0845	159.6	161.3	54.5	21.3959	4
13	3	31	157.506	152.292	55.6369	1	13.0845	159.6	161.3	54.5	21.3959	4
13	3	32	72.6284	156.758	38.2027	1	13.0845	159.6	161.3	54.5	21.3959	4
13	3	33	184.41	22.1145	96.1121	1	13.0845	159.6	161.3	54.5	21.3959	4
13	3	34	170.099	16.9056	73.7621	1	13.0845	159.6	161.3	54.5	21.3959	4
13	3	35	200.321	58.9085	133.933	1	13.0845	159.6	161.3	54.5	21.3959	4
13	3	36	513.992	46.6087	226.825	1	13.0845	159.6	161.3	54.5	21.3959	4
13	3	37	487.031	52.3562	499.937	1	13.0845	159.6	161.3	54.5	21.3959	4
13	3	38	350.034	84.5592	610.915	1	13.0845	159.6	161.3	54.5	21.3959	4
13	3	39	372.389	31.5886	438.168	1	13.0845	159.6	161.3	54.5	21.3959	4
13	3	40	510.629	93.4604	365.257	1	13.0845	159.6	161.3	54.5	21.3959	4
13	3	41	510.629	79.9485	427.988	1	13.0845	159.6	161.3	54.5	21.3959	4
13	3	42	496.828	77.8245	477.044	1	13.0845	159.6	161.3	54.5	21.3959	4
13	3	43	480.505	90.8639	470.782	1	13.0845	159.6	161.3	54.5	21.3959	4
13	3	44	305.529	92.6499	359.659	1	13.0845	159.6	161.3	54.5	21.3959	4
13	3	45	266.859	24.4364	134.316	1	13.0845	159.6	161.3	54.5	21.3959	4
13	3	46	230.256	39.7458	71.504	1	13.0845	159.6	161.3	54.5	21.3959	4
13	3	47	232.598	112.357	26.5663	1	13.0845	159.6	161.3	54.5	21.3959	4
13	3	48	229.359	138	81.3488	1	13.0845	159.6	161.3	54.5	21.3959	4
13	3	49	247.457	29.8101	77.3349	1	13.0845	159.6	161.3	54.5	21.3959	4
13	3	50	257.24	12.1696	59.3553	1	13.0845	159.6	161.3	54.5	21.3959	4
13	3	51	257.724	22.3886	83.2181	1	13.0845	159.6	161.3	54.5	21.3959	4
13	3	52	247.721	38.8851	109.236	1	13.0845	159.6	161.3	54.5	21.3959	4
13	3	53	159.209	18.5224	122.885	1	13.0845	159.6	161.3	54.5	21.3959	4
13	3	54	61.0794	155.869	86.7468	1	13.0845	159.6	161.3	54.5	21.3959	4
13	3	55	405.789	152.226	122.202	1	13.0845	159.6	161.3	54.5	21.3959	4
13	3	56			182.304	1	13.0845	159.6	161.3	54.5	21.3959	4
13	3	57			818.3	1	13.0845	159.6	161.3	54.5	21.3959	4
13	3	58			116.584	1	13.0845	159.6	161.3	54.5	21.3959	4
13	3	59				1	13.0845	159.6	161.3	54.5	21.3959	4
13	3	60				1	13.0845	159.6	161.3	54.5	21.3959	4
14	3	1	244.739	23.2648	377.307	1	12.808	152.3	155.3	52.6	22.677	3
14	3	2	218.361	44.5189	318.098	1	12.808	152.3	155.3	52.6	22.677	3
14	3	3	175.005	63.6805	246.339	1	12.808	152.3	155.3	52.6	22.677	3
14	3	4	157.976	24.2792	114.92	1	12.808	152.3	155.3	52.6	22.677	3
14	3	5	132.48	26.8069	163.984	1	12.808	152.3	155.3	52.6	22.677	3
14	3	6	100.074	35.8699	163.984	1	12.808	152.3	155.3	52.6	22.677	3
14	3	7	111.785	30.3453	175.756	1	12.808	152.3	155.3	52.6	22.677	3
14	3	8	125.564	93.2595	217.94	1	12.808	152.3	155.3	52.6	22.677	3
14	3	9	179.672	93.2595	100.863	1	12.808	152.3	155.3	52.6	22.677	3
14	3	10	200.978	54.3472	119.321	1	12.808	152.3	155.3	52.6	22.677	3
14	3	11	385.091	47.8987	110.026	1	12.808	152.3	155.3	52.6	22.677	3
14	3	12	407.68	30.76	75.9219	1	12.808	152.3	155.3	52.6	22.677	3
14	3	13	517.271	39.7485	169.343	1	12.808	152.3	155.3	52.6	22.677	3
14	3	14	419.966	85.4239	277.459	1	12.808	152.3	155.3	52.6	22.677	3
14	3	15	399.021	15.9013	243.133	1	12.808	152.3	155.3	52.6	22.677	3
14	3	16	357.163	42.2806	54.4208	1	12.808	152.3	155.3	52.6	22.677	3
14	3	17	167.442	71.8282	63.843	1	12.808	152.3	155.3	52.6	22.677	3
14	3	18	242.012	80.6952	231.354	1	12.808	152.3	155.3	52.6	22.677	3
14	3	19	285.412	129.081	345.545	1	12.808	152.3	155.3	52.6	22.677	3
14	3	20	360.217	101.467	288.864	1	12.808	152.3	155.3	52.6	22.677	3
14	3	21	280.534	96.4627	381.21	1	12.808	152.3	155.3	52.6	22.677	3
14	3	22	222.201	152.114	257.537	1	12.808	152.3	155.3	52.6	22.677	3
14	3	23	108.035	92.5795	269.308	1	12.808	152.3	155.3	52.6	22.677	3
14	3	24	71.5881	75.9479	257.41	1	12.808	152.3	155.3	52.6	22.677	3
14	3	25	127.536	50.1124	178.701	1	12.808	152.3	155.3	52.6	22.677	3
14	3	26	238.826	79.2811	162.343	1	12.808	152.3	155.3	52.6	22.677	3
14	3	27	377.135	105.318	94.2669	1	12.808	152.3	155.3	52.6	22.677	3
14	3	28	511.549	141.409	152.459	1	12.808	152.3	155.3	52.6	22.677	3
14	3	29	392.84	137.671	91.0126	1	12.808	152.3	155.3	52.6	22.677	3
14	3	30	394.574	58.5123	10.7005	1	12.808	152.3	155.3	52.6	22.677	3
14	3	31	374.89	85.0383	22.4804	1	12.808	152.3	155.3	52.6	22.677	3
14	3	32	210.472	75.064	88.0546	1	12.808	152.3	155.3	52.6	22.677	3
14	3	33	176.584	114.445	127.44	1	12.808	152.3	155.3	52.6	22.677	3
14	3	34	4.01622	186.837	245.26	1	12.808	152.3	155.3	52.6	22.677	3
14	3	35	42.757	194.7	189.255	1	12.808	152.3	155.3	52.6	22.677	3
14	3	36	65.1777	80.86	132.947	1	12.808	152.3	155.3	52.6	22.677	3
14	3	37	70.9119	94.1532	96.9736	1	12.808	152.3	155.3	52.6	22.677	3
14	3	38	80.4167	174.264	144.227	1	12.808	152.3	155.3	52.6	22.677	3
14	3	39	96.2229	134.254	144.391	1	12.808	152.3	155.3	52.6	22.677	3
14	3	40	147.474	83.1241	77.9951	1	12.808	152.3	155.3	52.6	22.677	3
14	3	41	316.224	44.9384	96.9277	1	12.808	152.3	155.3	52.6	22.677	3
14	3	42	250.422	33.1157	117.006	1	12.808	152.3	155.3	52.6	22.677	3
14	3	43	87.8722	22.3222	77.2894	1	12.808	152.3	155.3	52.6	22.677	3
14	3	44	118.9	57.1592	69.3851	1	12.808	152.3	155.3	52.6	22.677	3
14	3	45	156.758	75.8821	33.9666	1	12.808	152.3	155.3	52.6	22.677	3
14	3	46	156.758	67.2697	95.1162	1	12.808	152.3	155.3	52.6	22.677	3
14	3	47	431.592	108.794	126.151	1	12.808	152.3	155.3	52.6	22.677	3
14	3	48	398.775	110.026	87.8722	1	12.808	152.3	155.3	52.6	22.677	3
14	3	49	398.775	98.2325	398.775	1	12.808	152.3	155.3	52.6	22.677	3
14	3	50	256.864	81.2297	205.476	1	12.808	152.3	155.3	52.6	22.677	3
14	3	51	311.416	89.1785	405.796	1	12.808	152.3	155.3	52.6	22.677	3
14	3	52	86.2423	95.1422	222.321	1	12.808	152.3	155.3	52.6	22.677	3
14	3	53	103.326	84.7597	208.147	1	12.808	152.3	155.3	52.6	22.677	3
14	3	54		87.9092	251.995	1	12.808	152.3	155.3	52.6	22.677	3
14	3	55		127.067	402.278	1	12.808	152.3	155.3	52.6	22.677	3
14	3	56		128.854	247.533	1	12.808	152.3	155.3	52.6	22.677	3
14	3	57		110.009		1	12.808	152.3	155.3	52.6	22.677	3
14	3	58				1	12.808	152.3	155.3	52.6	22.677	3
14	3	59				1	12.808	152.3	155.3	52.6	22.677	3
14	3	60				1	12.808	152.3	155.3	52.6	22.677	3
15	3	1	162.033	61.5114	100.124	1	11.5951	158.2	159.3	49.2	19.6586	5
15	3	2	255.707	68.6012	138.039	1	11.5951	158.2	159.3	49.2	19.6586	5
15	3	3	430.153	70.7028	64.1814	1	11.5951	158.2	159.3	49.2	19.6586	5
15	3	4	156.783	133.944	41.503	1	11.5951	158.2	159.3	49.2	19.6586	5
15	3	5	163.577	43.7069	83.3639	1	11.5951	158.2	159.3	49.2	19.6586	5
15	3	6	398.684	43.2863	90.4613	1	11.5951	158.2	159.3	49.2	19.6586	5
15	3	7	374.591	25.894	211.422	1	11.5951	158.2	159.3	49.2	19.6586	5
15	3	8	269.635	22.3618	111.495	1	11.5951	158.2	159.3	49.2	19.6586	5
15	3	9	248.951	32.2865	83.3235	1	11.5951	158.2	159.3	49.2	19.6586	5
15	3	10	240.525	26.5663	72.9032	1	11.5951	158.2	159.3	49.2	19.6586	5
15	3	11	234.639	55.5203	137.351	1	11.5951	158.2	159.3	49.2	19.6586	5
15	3	12	284.163	37.3109	190.685	1	11.5951	158.2	159.3	49.2	19.6586	5
15	3	13	191.48	62.8834	319.866	1	11.5951	158.2	159.3	49.2	19.6586	5
15	3	14	211.422	92.665	123.711	1	11.5951	158.2	159.3	49.2	19.6586	5
15	3	15	420.331	103.592	31.3409	1	11.5951	158.2	159.3	49.2	19.6586	5
15	3	16	459.231	62.5936	79.4089	1	11.5951	158.2	159.3	49.2	19.6586	5
15	3	17	497.579	50.1124	60.92	1	11.5951	158.2	159.3	49.2	19.6586	5
15	3	18	402.1	65.3717	101.843	1	11.5951	158.2	159.3	49.2	19.6586	5
15	3	19	217.052	79.6227	8.82043	1	11.5951	158.2	159.3	49.2	19.6586	5
15	3	20	95.4637	62.7313	27.9256	1	11.5951	158.2	159.3	49.2	19.6586	5
15	3	21	250.757	137.788	221.088	1	11.5951	158.2	159.3	49.2	19.6586	5
15	3	22	273.896	153.393	215.462	1	11.5951	158.2	159.3	49.2	19.6586	5
15	3	23	265.604	214.511	248.749	1	11.5951	158.2	159.3	49.2	19.6586	5
15	3	24	82.7586	111.8	202.152	1	11.5951	158.2	159.3	49.2	19.6586	5
15	3	25	86.2423	70.1317	48.2037	1	11.5951	158.2	159.3	49.2	19.6586	5
15	3	26	109.979	61.7981	145.429	1	11.5951	158.2	159.3	49.2	19.6586	5
15	3	27	304.55	111.281	124.285	1	11.5951	158.2	159.3	49.2	19.6586	5
15	3	28	262.428	164.602	83.6909	1	11.5951	158.2	159.3	49.2	19.6586	5
15	3	29	106.73	188.248	45.2383	1	11.5951	158.2	159.3	49.2	19.6586	5
15	3	30	98.1901	103.345	56.1044	1	11.5951	158.2	159.3	49.2	19.6586	5
15	3	31	343.555	74.8054	96.6864	1	11.5951	158.2	159.3	49.2	19.6586	5
15	3	32	202.03	52.7266	59.5187	1	11.5951	158.2	159.3	49.2	19.6586	5
15	3	33	196.246	46.8711	15.9013	1	11.5951	158.2	159.3	49.2	19.6586	5
15	3	34	196.246	47.1874	92.4424	1	11.5951	158.2	159.3	49.2	19.6586	5
15	3	35	308.39	24.2792	155.915	1	11.5951	158.2	159.3	49.2	19.6586	5
15	3	36	299.807	22.3886	69.9824	1	11.5951	158.2	159.3	49.2	19.6586	5
15	3	37	215.462	22.6177	163.228	1	11.5951	158.2	159.3	49.2	19.6586	5
15	3	38	90.3793	35.8699	325.993	1	11.5951	158.2	159.3	49.2	19.6586	5
15	3	39	101.735	77.9431	291.768	1	11.5951	158.2	159.3	49.2	19.6586	5
15	3	40	199.211	96.1068	504.06	1	11.5951	158.2	159.3	49.2	19.6586	5
15	3	41	284.467	59.3933	324.941	1	11.5951	158.2	159.3	49.2	19.6586	5
15	3	42	241.346	114.851	284.792	1	11.5951	158.2	159.3	49.2	19.6586	5
15	3	43	112.767	138.016	213.514	1	11.5951	158.2	159.3	49.2	19.6586	5
15	3	44	111.417	115.033	118.089	1	11.5951	158.2	159.3	49.2	19.6586	5
15	3	45	158.113	44.5189	42.737	1	11.5951	158.2	159.3	49.2	19.6586	5
15	3	46	360.239	61.3196	84.3294	1	11.5951	158.2	159.3	49.2	19.6586	5
15	3	47	431.592	61.306	150.292	1	11.5951	158.2	159.3	49.2	19.6586	5
15	3	48	398.775	93.1885	313.973	1	11.5951	158.2	159.3	49.2	19.6586	5
15	3	49	398.775	195.938	312.554	1	11.5951	158.2	159.3	49.2	19.6586	5
15	3	50	314.751	196.626	222.666	1	11.5951	158.2	159.3	49.2	19.6586	5
15	3	51	219.938	189.564	279.57	1	11.5951	158.2	159.3	49.2	19.6586	5
15	3	52	284.163	187.124	205.838	1	11.5951	158.2	159.3	49.2	19.6586	5
15	3	53	277.04	193.46	244.528	1	11.5951	158.2	159.3	49.2	19.6586	5
15	3	54		169.173	207.853	1	11.5951	158.2	159.3	49.2	19.6586	5
15	3	55		140.002	224.773	1	11.5951	158.2	159.3	49.2	19.6586	5
15	3	56		88.4699	204.899	1	11.5951	158.2	159.3	49.2	19.6586	5
15	3	57			185.345	1	11.5951	158.2	159.3	49.2	19.6586	5
15	3	58			116.584	1	11.5951	158.2	159.3	49.2	19.6586	5
15	3	59				1	11.5951	158.2	159.3	49.2	19.6586	5
15	3	60				1	11.5951	158.2	159.3	49.2	19.6586	5
16	3	1	240.296	69.3537	194.006	1	13.7354	142.2	145.2	58.1	28.7327	5
16	3	2	196.143	68.6267	188.248	1	13.7354	142.2	145.2	58.1	28.7327	5
16	3	3	130.615	70.1396	174.013	1	13.7354	142.2	145.2	58.1	28.7327	5
16	3	4	213.421	190.685	210.38	1	13.7354	142.2	145.2	58.1	28.7327	5
16	3	5	198.346	189.194	135.766	1	13.7354	142.2	145.2	58.1	28.7327	5
16	3	6	199.659	190.891	138.217	1	13.7354	142.2	145.2	58.1	28.7327	5
16	3	7	370.948	131.528	137.497	1	13.7354	142.2	145.2	58.1	28.7327	5
16	3	8	333.863	116.941	166.666	1	13.7354	142.2	145.2	58.1	28.7327	5
16	3	9	428.513	99.6885	213.068	1	13.7354	142.2	145.2	58.1	28.7327	5
16	3	10	308.39	17.7138	80.6221	1	13.7354	142.2	145.2	58.1	28.7327	5
16	3	11	276.751	39.6919	78.2081	1	13.7354	142.2	145.2	58.1	28.7327	5
16	3	12	376.545	40.5295	92.9446	1	13.7354	142.2	145.2	58.1	28.7327	5
16	3	13	386.697	30.76	87.4443	1	13.7354	142.2	145.2	58.1	28.7327	5
16	3	14	387.101	48.5721	56.3881	1	13.7354	142.2	145.2	58.1	28.7327	5
16	3	15	156.276	39.9686	94.6119	1	13.7354	142.2	145.2	58.1	28.7327	5
16	3	16	156.276	56.0694	96.774	1	13.7354	142.2	145.2	58.1	28.7327	5
16	3	17	166.125	45.9913	69.0395	1	13.7354	142.2	145.2	58.1	28.7327	5
16	3	18	186.927	62.67	204.623	1	13.7354	142.2	145.2	58.1	28.7327	5
16	3	19	238.975	39.0493	175.568	1	13.7354	142.2	145.2	58.1	28.7327	5
16	3	20	214.685	14.5248	211.719	1	13.7354	142.2	145.2	58.1	28.7327	5
16	3	21	246.425	86.9904	109.713	1	13.7354	142.2	145.2	58.1	28.7327	5
16	3	22	239.282	87.9052	56.5106	1	13.7354	142.2	145.2	58.1	28.7327	5
16	3	23	206.219	87.4443	66.9377	1	13.7354	142.2	145.2	58.1	28.7327	5
16	3	24	197.735	87.4301	85.5632	1	13.7354	142.2	145.2	58.1	28.7327	5
16	3	25	158.703	87.9052	65.9883	1	13.7354	142.2	145.2	58.1	28.7327	5
16	3	26	108.894	61.36	70.2164	1	13.7354	142.2	145.2	58.1	28.7327	5
16	3	27	96.6712	58.8914	111.518	1	13.7354	142.2	145.2	58.1	28.7327	5
16	3	28	66.1354	42.9629	110.958	1	13.7354	142.2	145.2	58.1	28.7327	5
16	3	29	53.9609	40.4145	98.3881	1	13.7354	142.2	145.2	58.1	28.7327	5
16	3	30	60.7348	66.6082	104.991	1	13.7354	142.2	145.2	58.1	28.7327	5
16	3	31	79.3706	203.103	138.662	1	13.7354	142.2	145.2	58.1	28.7327	5
16	3	32	99.2367	253.472	126.058	1	13.7354	142.2	145.2	58.1	28.7327	5
16	3	33	229.302	252.561	117.629	1	13.7354	142.2	145.2	58.1	28.7327	5
16	3	34	316.391	226.95	282.368	1	13.7354	142.2	145.2	58.1	28.7327	5
16	3	35	330.941	141.214	451.243	1	13.7354	142.2	145.2	58.1	28.7327	5
16	3	36	223.731	108.205	428.28	1	13.7354	142.2	145.2	58.1	28.7327	5
16	3	37	109.55	194.662	565.418	1	13.7354	142.2	145.2	58.1	28.7327	5
16	3	38	125.021	254.736	757.064	1	13.7354	142.2	145.2	58.1	28.7327	5
16	3	39	115.542	255.537	773.846	1	13.7354	142.2	145.2	58.1	28.7327	5
16	3	40	244.516	209.07	465.062	1	13.7354	142.2	145.2	58.1	28.7327	5
16	3	41	278.16	161.646	471.926	1	13.7354	142.2	145.2	58.1	28.7327	5
16	3	42	241.63	191.48	419.921	1	13.7354	142.2	145.2	58.1	28.7327	5
16	3	43	218.558	106.886	622.175	1	13.7354	142.2	145.2	58.1	28.7327	5
16	3	44	216.485	106.886	271.044	1	13.7354	142.2	145.2	58.1	28.7327	5
16	3	45	166.704	234.649	346.772	1	13.7354	142.2	145.2	58.1	28.7327	5
16	3	46	124.594	190.751	140.06	1	13.7354	142.2	145.2	58.1	28.7327	5
16	3	47	196.388	74.6877	133.311	1	13.7354	142.2	145.2	58.1	28.7327	5
16	3	48	223.731	82.7022	98.9014	1	13.7354	142.2	145.2	58.1	28.7327	5
16	3	49	333.863	63.5525	58.7647	1	13.7354	142.2	145.2	58.1	28.7327	5
16	3	50	192.544	42.757	129.804	1	13.7354	142.2	145.2	58.1	28.7327	5
16	3	51	194.7	65.6964	173.446	1	13.7354	142.2	145.2	58.1	28.7327	5
16	3	52	211.189	109.564	120.7	1	13.7354	142.2	145.2	58.1	28.7327	5
16	3	53		158.001	131.002	1	13.7354	142.2	145.2	58.1	28.7327	5
16	3	54		156.249	172.641	1	13.7354	142.2	145.2	58.1	28.7327	5
16	3	55			153.301	1	13.7354	142.2	145.2	58.1	28.7327	5
16	3	56			84.2682	1	13.7354	142.2	145.2	58.1	28.7327	5
16	3	57			81.2724	1	13.7354	142.2	145.2	58.1	28.7327	5
16	3	58			116.584	1	13.7354	142.2	145.2	58.1	28.7327	5
16	3	59				1	13.7354	142.2	145.2	58.1	28.7327	5
16	3	60				1	13.7354	142.2	145.2	58.1	28.7327	5
17	3	1	177.295	84.838	530.699	2	11.5349	160	154.6	51.2	20	7
17	3	2	111.281	154.985	305.029	2	11.5349	160	154.6	51.2	20	7
17	3	3	237.114	185.444	403.152	2	11.5349	160	154.6	51.2	20	7
17	3	4	247.932	174.623	334.145	2	11.5349	160	154.6	51.2	20	7
17	3	5	274.6	79.3136	68.7092	2	11.5349	160	154.6	51.2	20	7
17	3	6	255.589	124.368	165.508	2	11.5349	160	154.6	51.2	20	7
17	3	7	188.046	440.871	179.02	2	11.5349	160	154.6	51.2	20	7
17	3	8	253.419	359.909	270.963	2	11.5349	160	154.6	51.2	20	7
17	3	9	199.729	552.708	292.611	2	11.5349	160	154.6	51.2	20	7
17	3	10	331.624	408.582	286.313	2	11.5349	160	154.6	51.2	20	7
17	3	11	257.801	457.262	249.708	2	11.5349	160	154.6	51.2	20	7
17	3	12	255.962	432.288	310.353	2	11.5349	160	154.6	51.2	20	7
17	3	13	299.596	384.215	313.665	2	11.5349	160	154.6	51.2	20	7
17	3	14	317.111	359.909	306.118	2	11.5349	160	154.6	51.2	20	7
17	3	15	289.852	346.739	257.083	2	11.5349	160	154.6	51.2	20	7
17	3	16	156.283	307.365	167.915	2	11.5349	160	154.6	51.2	20	7
17	3	17	106.337	310.353	15.9176	2	11.5349	160	154.6	51.2	20	7
17	3	18	66.332	279.16	11.7478	2	11.5349	160	154.6	51.2	20	7
17	3	19	270.818	276.207	202.919	2	11.5349	160	154.6	51.2	20	7
17	3	20	276.677	209.109	239.741	2	11.5349	160	154.6	51.2	20	7
17	3	21	258.803	193.734	174.423	2	11.5349	160	154.6	51.2	20	7
17	3	22	192.615	134.056	255.57	2	11.5349	160	154.6	51.2	20	7
17	3	23	77.9951	377.209	387.101	2	11.5349	160	154.6	51.2	20	7
17	3	24	71.2234	274.774	181.276	2	11.5349	160	154.6	51.2	20	7
17	3	25	87.1535	64.0612	28.1684	2	11.5349	160	154.6	51.2	20	7
17	3	26	134.056	132.834	77.8245	2	11.5349	160	154.6	51.2	20	7
17	3	27	233.094	146.992	120.719	2	11.5349	160	154.6	51.2	20	7
17	3	28	275.097	133.411	142.986	2	11.5349	160	154.6	51.2	20	7
17	3	29	293.351	223.091	511.556	2	11.5349	160	154.6	51.2	20	7
17	3	30	261.334	244.761	468.151	2	11.5349	160	154.6	51.2	20	7
17	3	31	220.322	247.636	400.365	2	11.5349	160	154.6	51.2	20	7
17	3	32	170.74	164.98	404.443	2	11.5349	160	154.6	51.2	20	7
17	3	33	187.703	138.262	587.267	2	11.5349	160	154.6	51.2	20	7
17	3	34	147.474	205.951	372.426	2	11.5349	160	154.6	51.2	20	7
17	3	35	244.778	223.296	467.108	2	11.5349	160	154.6	51.2	20	7
17	3	36	145.454	304.862	475.057	2	11.5349	160	154.6	51.2	20	7
17	3	37	174.094	531.552	508.847	2	11.5349	160	154.6	51.2	20	7
17	3	38	332.085	468.38	67.5406	2	11.5349	160	154.6	51.2	20	7
17	3	39	290.761	477.229	70.9384	2	11.5349	160	154.6	51.2	20	7
17	3	40	315.463	305.992	276.707	2	11.5349	160	154.6	51.2	20	7
17	3	41	374.396	540.056	276.759	2	11.5349	160	154.6	51.2	20	7
17	3	42	323.984	497.844	248.463	2	11.5349	160	154.6	51.2	20	7
17	3	43	233.591	526.115	79.3136	2	11.5349	160	154.6	51.2	20	7
17	3	44	91.346	509.346	145.693	2	11.5349	160	154.6	51.2	20	7
17	3	45	92.9297	507.612	114.007	2	11.5349	160	154.6	51.2	20	7
17	3	46	131.977	504.06		2	11.5349	160	154.6	51.2	20	7
17	3	47	278.375	720.257		2	11.5349	160	154.6	51.2	20	7
17	3	48	286.997			2	11.5349	160	154.6	51.2	20	7
17	3	49	333.431			2	11.5349	160	154.6	51.2	20	7
17	3	50	391.332			2	11.5349	160	154.6	51.2	20	7
17	3	51	283.387			2	11.5349	160	154.6	51.2	20	7
17	3	52	240.36			2	11.5349	160	154.6	51.2	20	7
17	3	53	240.36			2	11.5349	160	154.6	51.2	20	7
17	3	54	273.475			2	11.5349	160	154.6	51.2	20	7
17	3	55				2	11.5349	160	154.6	51.2	20	7
17	3	56				2	11.5349	160	154.6	51.2	20	7
17	3	57				2	11.5349	160	154.6	51.2	20	7
17	3	58				2	11.5349	160	154.6	51.2	20	7
17	3	59				2	11.5349	160	154.6	51.2	20	7
17	3	60				2	11.5349	160	154.6	51.2	20	7
18	3	1	149.456	49.1717	314.256	1	11.0612	150.3	152.3	50.3	22.2664	7
18	3	2	22.2032	61.5435	359.909	1	11.0612	150.3	152.3	50.3	22.2664	7
18	3	3	29.8101	88.904	196.626	1	11.0612	150.3	152.3	50.3	22.2664	7
18	3	4	67.1472	214.45	175.882	1	11.0612	150.3	152.3	50.3	22.2664	7
18	3	5	104.752	144.704	89.5818	1	11.0612	150.3	152.3	50.3	22.2664	7
18	3	6	134.813	162.466	119.496	1	11.0612	150.3	152.3	50.3	22.2664	7
18	3	7	187.791	86.9691	119.496	1	11.0612	150.3	152.3	50.3	22.2664	7
18	3	8	219.32	140.93	99.5454	1	11.0612	150.3	152.3	50.3	22.2664	7
18	3	9	282.904	72.8892	56.6004	1	11.0612	150.3	152.3	50.3	22.2664	7
18	3	10	376.236	121.52	72.8962	1	11.0612	150.3	152.3	50.3	22.2664	7
18	3	11	319.445	46.2576	107.37	1	11.0612	150.3	152.3	50.3	22.2664	7
18	3	12	303.714	232.866	71.0854	1	11.0612	150.3	152.3	50.3	22.2664	7
18	3	13	203.103	140.356	47.3942	1	11.0612	150.3	152.3	50.3	22.2664	7
18	3	14	145.532	220.833	51.7177	1	11.0612	150.3	152.3	50.3	22.2664	7
18	3	15	86.1246	115.436	116.947	1	11.0612	150.3	152.3	50.3	22.2664	7
18	3	16	95.5026	181.336	102.431	1	11.0612	150.3	152.3	50.3	22.2664	7
18	3	17	96.7442	142.341	78.8975	1	11.0612	150.3	152.3	50.3	22.2664	7
18	3	18	101.626	127.746	47.8402	1	11.0612	150.3	152.3	50.3	22.2664	7
18	3	19	108.653	223.741	165.867	1	11.0612	150.3	152.3	50.3	22.2664	7
18	3	20	109.531	193.484	151.973	1	11.0612	150.3	152.3	50.3	22.2664	7
18	3	21	274.805	190.751	178.722	1	11.0612	150.3	152.3	50.3	22.2664	7
18	3	22	331.462	109.436	201.312	1	11.0612	150.3	152.3	50.3	22.2664	7
18	3	23	366.539	288.016	233.94	1	11.0612	150.3	152.3	50.3	22.2664	7
18	3	24	392.965	272.159	230.07	1	11.0612	150.3	152.3	50.3	22.2664	7
18	3	25	190.089	126.105	229.745	1	11.0612	150.3	152.3	50.3	22.2664	7
18	3	26	158.226	143.844	211.454	1	11.0612	150.3	152.3	50.3	22.2664	7
18	3	27	195.242	74.9417	250.937	1	11.0612	150.3	152.3	50.3	22.2664	7
18	3	28	321.749	45.1359	292.104	1	11.0612	150.3	152.3	50.3	22.2664	7
18	3	29	331.459	106.936	427.302	1	11.0612	150.3	152.3	50.3	22.2664	7
18	3	30	364.895	80.1901	403.013	1	11.0612	150.3	152.3	50.3	22.2664	7
18	3	31	400.22	58.9085	400.649	1	11.0612	150.3	152.3	50.3	22.2664	7
18	3	32	529.645	153.919	257.071	1	11.0612	150.3	152.3	50.3	22.2664	7
18	3	33	516.21	310.183	237.088	1	11.0612	150.3	152.3	50.3	22.2664	7
18	3	34	330.259	190.751	224.821	1	11.0612	150.3	152.3	50.3	22.2664	7
18	3	35	307.379	183.149	255.371	1	11.0612	150.3	152.3	50.3	22.2664	7
18	3	36	275.106	158.745	240.891	1	11.0612	150.3	152.3	50.3	22.2664	7
18	3	37	248.933	38.7371	249.999	1	11.0612	150.3	152.3	50.3	22.2664	7
18	3	38	142.223	106.329	196.802	1	11.0612	150.3	152.3	50.3	22.2664	7
18	3	39	263.132	219.435	56.1044	1	11.0612	150.3	152.3	50.3	22.2664	7
18	3	40	147.307	140.813	197.114	1	11.0612	150.3	152.3	50.3	22.2664	7
18	3	41	248.401	145.162	212.769	1	11.0612	150.3	152.3	50.3	22.2664	7
18	3	42	319.445	103.379	247.721	1	11.0612	150.3	152.3	50.3	22.2664	7
18	3	43	334.621	58.9211	286.733	1	11.0612	150.3	152.3	50.3	22.2664	7
18	3	44	484.758	82.7415	288.334	1	11.0612	150.3	152.3	50.3	22.2664	7
18	3	45	492.433	270.706	339.605	1	11.0612	150.3	152.3	50.3	22.2664	7
18	3	46	489.921	286.412	218.697	1	11.0612	150.3	152.3	50.3	22.2664	7
18	3	47	451.896	96.0675	171.121	1	11.0612	150.3	152.3	50.3	22.2664	7
18	3	48	441.132	55.829	114.552	1	11.0612	150.3	152.3	50.3	22.2664	7
18	3	49	552.168	43.3872	96.188	1	11.0612	150.3	152.3	50.3	22.2664	7
18	3	50	508.847	55.145	114.765	1	11.0612	150.3	152.3	50.3	22.2664	7
18	3	51	489.211	43.5744	109.531	1	11.0612	150.3	152.3	50.3	22.2664	7
18	3	52	423.238	61.9345	331.181	1	11.0612	150.3	152.3	50.3	22.2664	7
18	3	53	307.256	104.389	302.203	1	11.0612	150.3	152.3	50.3	22.2664	7
18	3	54	258.042	126.052	266.534	1	11.0612	150.3	152.3	50.3	22.2664	7
18	3	55	192.867			1	11.0612	150.3	152.3	50.3	22.2664	7
18	3	56				1	11.0612	150.3	152.3	50.3	22.2664	7
18	3	57				1	11.0612	150.3	152.3	50.3	22.2664	7
18	3	58				1	11.0612	150.3	152.3	50.3	22.2664	7
18	3	59				1	11.0612	150.3	152.3	50.3	22.2664	7
18	3	60				1	11.0612	150.3	152.3	50.3	22.2664	7
19	3	1	161.312	258.901	167.915	1	11.4555	166.3	168.6	51.9	18.7665	7
19	3	2	207.194	170.502	108.478	1	11.4555	166.3	168.6	51.9	18.7665	7
19	3	3	76.5847	116.729	96.6864	1	11.4555	166.3	168.6	51.9	18.7665	7
19	3	4	166.314	111.293	78.6884	1	11.4555	166.3	168.6	51.9	18.7665	7
19	3	5	169.615	55.4838	92.6745	1	11.4555	166.3	168.6	51.9	18.7665	7
19	3	6	259.544	86.1985	92.6745	1	11.4555	166.3	168.6	51.9	18.7665	7
19	3	7	278.976	58.9207	91.6239	1	11.4555	166.3	168.6	51.9	18.7665	7
19	3	8	430.522	327.508	100.732	1	11.4555	166.3	168.6	51.9	18.7665	7
19	3	9	440.685	404.443	348.517	1	11.4555	166.3	168.6	51.9	18.7665	7
19	3	10	426.406	432.05	315.681	1	11.4555	166.3	168.6	51.9	18.7665	7
19	3	11	367.009	295.679	375.414	1	11.4555	166.3	168.6	51.9	18.7665	7
19	3	12	315.799	144.704	457.677	1	11.4555	166.3	168.6	51.9	18.7665	7
19	3	13	257.136	128.128	375.366	1	11.4555	166.3	168.6	51.9	18.7665	7
19	3	14	228.36	192.623	326.733	1	11.4555	166.3	168.6	51.9	18.7665	7
19	3	15	220.94	473.583	238.196	1	11.4555	166.3	168.6	51.9	18.7665	7
19	3	16	204.899	504.598	202.145	1	11.4555	166.3	168.6	51.9	18.7665	7
19	3	17	140.251	509.21	167.915	1	11.4555	166.3	168.6	51.9	18.7665	7
19	3	18	135.014	303.714	149.707	1	11.4555	166.3	168.6	51.9	18.7665	7
19	3	19	109.185	383.933	87.1535	1	11.4555	166.3	168.6	51.9	18.7665	7
19	3	20	79.1804	456.937	57.0312	1	11.4555	166.3	168.6	51.9	18.7665	7
19	3	21	159.659	530.065	87.1535	1	11.4555	166.3	168.6	51.9	18.7665	7
19	3	22	154.524	480.239	141.144	1	11.4555	166.3	168.6	51.9	18.7665	7
19	3	23	74.674	378.357	251.504	1	11.4555	166.3	168.6	51.9	18.7665	7
19	3	24	69.1712	446.515	226.986	1	11.4555	166.3	168.6	51.9	18.7665	7
19	3	25	70.1912	759.801	199.637	1	11.4555	166.3	168.6	51.9	18.7665	7
19	3	26	82.3787	672.946	342.755	1	11.4555	166.3	168.6	51.9	18.7665	7
19	3	27	79.8492	552.945	228.949	1	11.4555	166.3	168.6	51.9	18.7665	7
19	3	28	95.1422	427.302	170.385	1	11.4555	166.3	168.6	51.9	18.7665	7
19	3	29	93.7926	540.608	126.116	1	11.4555	166.3	168.6	51.9	18.7665	7
19	3	30	83.0394	425.501	140.098	1	11.4555	166.3	168.6	51.9	18.7665	7
19	3	31	356.131	386.697	344.743	1	11.4555	166.3	168.6	51.9	18.7665	7
19	3	32	327.031	400.109	359.188	1	11.4555	166.3	168.6	51.9	18.7665	7
19	3	33	317.855	617.86	369.502	1	11.4555	166.3	168.6	51.9	18.7665	7
19	3	34	382.941	508.868	367.495	1	11.4555	166.3	168.6	51.9	18.7665	7
19	3	35	235.829	628.431	368.562	1	11.4555	166.3	168.6	51.9	18.7665	7
19	3	36	96.5389	590.285	315.23	1	11.4555	166.3	168.6	51.9	18.7665	7
19	3	37	87.7274	517.271	248.148	1	11.4555	166.3	168.6	51.9	18.7665	7
19	3	38	132.912	460.499	389.233	1	11.4555	166.3	168.6	51.9	18.7665	7
19	3	39	317.855	238.196	156.676	1	11.4555	166.3	168.6	51.9	18.7665	7
19	3	40	393.913	378.573	53.4694	1	11.4555	166.3	168.6	51.9	18.7665	7
19	3	41	182.973	412.48	111.526	1	11.4555	166.3	168.6	51.9	18.7665	7
19	3	42	82.7415	622.171	200.273	1	11.4555	166.3	168.6	51.9	18.7665	7
19	3	43	29.8188	586.058	304.087	1	11.4555	166.3	168.6	51.9	18.7665	7
19	3	44	29.4593	630.103	197.326	1	11.4555	166.3	168.6	51.9	18.7665	7
19	3	45	78.8056	646.416	206.942	1	11.4555	166.3	168.6	51.9	18.7665	7
19	3	46	69.9824	452.177	233.549	1	11.4555	166.3	168.6	51.9	18.7665	7
19	3	47	34.442	404.266	269.287	1	11.4555	166.3	168.6	51.9	18.7665	7
19	3	48	31.9453	442.086	191.611	1	11.4555	166.3	168.6	51.9	18.7665	7
19	3	49	76.742	586.176	86.2423	1	11.4555	166.3	168.6	51.9	18.7665	7
19	3	50		336.834	79.8997	1	11.4555	166.3	168.6	51.9	18.7665	7
19	3	51		332.112	83.0837	1	11.4555	166.3	168.6	51.9	18.7665	7
19	3	52		322.131	361.116	1	11.4555	166.3	168.6	51.9	18.7665	7
19	3	53		181.836		1	11.4555	166.3	168.6	51.9	18.7665	7
19	3	54		158.342		1	11.4555	166.3	168.6	51.9	18.7665	7
19	3	55				1	11.4555	166.3	168.6	51.9	18.7665	7
19	3	56				1	11.4555	166.3	168.6	51.9	18.7665	7
19	3	57				1	11.4555	166.3	168.6	51.9	18.7665	7
19	3	58				1	11.4555	166.3	168.6	51.9	18.7665	7
19	3	59				1	11.4555	166.3	168.6	51.9	18.7665	7
19	3	60				1	11.4555	166.3	168.6	51.9	18.7665	7
20	3	1	97.3673	174.359	167.915	2	14.6123	172.6	170.2	62.1	20.8454	3
20	3	2	100.863	28.4285	35.555	2	14.6123	172.6	170.2	62.1	20.8454	3
20	3	3	137.497	36.6481	28.8543	2	14.6123	172.6	170.2	62.1	20.8454	3
20	3	4	419.238	200.106	61.626	2	14.6123	172.6	170.2	62.1	20.8454	3
20	3	5	380.253	87.7216	64.4889	2	14.6123	172.6	170.2	62.1	20.8454	3
20	3	6	222.201	223.424	132.251	2	14.6123	172.6	170.2	62.1	20.8454	3
20	3	7	111.281	534.769	108.62	2	14.6123	172.6	170.2	62.1	20.8454	3
20	3	8	201.873	306.207	35.7414	2	14.6123	172.6	170.2	62.1	20.8454	3
20	3	9	274.379	400.2	14.384	2	14.6123	172.6	170.2	62.1	20.8454	3
20	3	10	315.267	366.2	31.6741	2	14.6123	172.6	170.2	62.1	20.8454	3
20	3	11	233.969	342.192	50.0128	2	14.6123	172.6	170.2	62.1	20.8454	3
20	3	12	151.284	287.612	149.626	2	14.6123	172.6	170.2	62.1	20.8454	3
20	3	13	253.727	315.878	156.386	2	14.6123	172.6	170.2	62.1	20.8454	3
20	3	14	226.686	466.438	159.713	2	14.6123	172.6	170.2	62.1	20.8454	3
20	3	15	235.647	394.166	42.1038	2	14.6123	172.6	170.2	62.1	20.8454	3
20	3	16	164.659	213.508	111.15	2	14.6123	172.6	170.2	62.1	20.8454	3
20	3	17	116.941	104.102	76.7721	2	14.6123	172.6	170.2	62.1	20.8454	3
20	3	18	228.932	38.9873	135.245	2	14.6123	172.6	170.2	62.1	20.8454	3
20	3	19	226.84	46.4247	247.454	2	14.6123	172.6	170.2	62.1	20.8454	3
20	3	20	188.221	157.333	28.3933	2	14.6123	172.6	170.2	62.1	20.8454	3
20	3	21	69.3537	307.469	60.3451	2	14.6123	172.6	170.2	62.1	20.8454	3
20	3	22	96.188	122.044	511.549	2	14.6123	172.6	170.2	62.1	20.8454	3
20	3	23	148.387	148.6	638.505	2	14.6123	172.6	170.2	62.1	20.8454	3
20	3	24	153.393	108.959	883.136	2	14.6123	172.6	170.2	62.1	20.8454	3
20	3	25	277.326	86.1246	951.97	2	14.6123	172.6	170.2	62.1	20.8454	3
20	3	26	220.287	65.3842	870.318	2	14.6123	172.6	170.2	62.1	20.8454	3
20	3	27	96.8632	71.0854	622.713	2	14.6123	172.6	170.2	62.1	20.8454	3
20	3	28	122.548	27.2002	575.492	2	14.6123	172.6	170.2	62.1	20.8454	3
20	3	29	124.801	123.96	457.061	2	14.6123	172.6	170.2	62.1	20.8454	3
20	3	30	152.484	90.3408	377.438	2	14.6123	172.6	170.2	62.1	20.8454	3
20	3	31	239.157	42.2806	301.057	2	14.6123	172.6	170.2	62.1	20.8454	3
20	3	32	362.998	5.69386	197.114	2	14.6123	172.6	170.2	62.1	20.8454	3
20	3	33	500.887	357.812	96.2747	2	14.6123	172.6	170.2	62.1	20.8454	3
20	3	34	431.534	321.232	175.181	2	14.6123	172.6	170.2	62.1	20.8454	3
20	3	35	433.447	174.264	133.296	2	14.6123	172.6	170.2	62.1	20.8454	3
20	3	36	188.865	57.0853	95.9546	2	14.6123	172.6	170.2	62.1	20.8454	3
20	3	37	37.5586	78.3827		2	14.6123	172.6	170.2	62.1	20.8454	3
20	3	38	41.2292	167.424		2	14.6123	172.6	170.2	62.1	20.8454	3
20	3	39	53.4958	567.201		2	14.6123	172.6	170.2	62.1	20.8454	3
20	3	40	84.8854	252.322		2	14.6123	172.6	170.2	62.1	20.8454	3
20	3	41	154.524	199.729		2	14.6123	172.6	170.2	62.1	20.8454	3
20	3	42	190.852	476.866		2	14.6123	172.6	170.2	62.1	20.8454	3
20	3	43	166.953	770.799		2	14.6123	172.6	170.2	62.1	20.8454	3
20	3	44	101.526	674.874		2	14.6123	172.6	170.2	62.1	20.8454	3
20	3	45	86.9147	636.063		2	14.6123	172.6	170.2	62.1	20.8454	3
20	3	46	84.1219			2	14.6123	172.6	170.2	62.1	20.8454	3
20	3	47	98.8422			2	14.6123	172.6	170.2	62.1	20.8454	3
20	3	48	119.938			2	14.6123	172.6	170.2	62.1	20.8454	3
20	3	49	116.655			2	14.6123	172.6	170.2	62.1	20.8454	3
20	3	50	119.412			2	14.6123	172.6	170.2	62.1	20.8454	3
20	3	51	142.613			2	14.6123	172.6	170.2	62.1	20.8454	3
20	3	52	142.082			2	14.6123	172.6	170.2	62.1	20.8454	3
20	3	53	350.893			2	14.6123	172.6	170.2	62.1	20.8454	3
20	3	54	325.189			2	14.6123	172.6	170.2	62.1	20.8454	3
20	3	55				2	14.6123	172.6	170.2	62.1	20.8454	3
20	3	56				2	14.6123	172.6	170.2	62.1	20.8454	3
20	3	57				2	14.6123	172.6	170.2	62.1	20.8454	3
20	3	58				2	14.6123	172.6	170.2	62.1	20.8454	3
20	3	59				2	14.6123	172.6	170.2	62.1	20.8454	3
20	3	60				2	14.6123	172.6	170.2	62.1	20.8454	3
21	1	1	229.87	123.058	114.888	1	15.0038	171.2	173	69	23.5419	3
21	1	2	392.307	80.434	297.422	1	15.0038	171.2	173	69	23.5419	3
21	1	3	281.875	41.4183	257.751	1	15.0038	171.2	173	69	23.5419	3
21	1	4	250.144	29.2638	294.62	1	15.0038	171.2	173	69	23.5419	3
21	1	5	189.193	86.1556	147.86	1	15.0038	171.2	173	69	23.5419	3
21	1	6	149.914	75.3543	164.684	1	15.0038	171.2	173	69	23.5419	3
21	1	7	76.9465	76.2888	215.959	1	15.0038	171.2	173	69	23.5419	3
21	1	8	66.5071	51.6533	185.95	1	15.0038	171.2	173	69	23.5419	3
21	1	9	68.5415	21.4146	103.558	1	15.0038	171.2	173	69	23.5419	3
21	1	10	188.141	52.7552	112.826	1	15.0038	171.2	173	69	23.5419	3
21	1	11	104.59	42.2052	199.588	1	15.0038	171.2	173	69	23.5419	3
21	1	12	138.359	17.6053	320.202	1	15.0038	171.2	173	69	23.5419	3
21	1	13	163.303	24.7367	310.963	1	15.0038	171.2	173	69	23.5419	3
21	1	14	136.97	26.116	352.629	1	15.0038	171.2	173	69	23.5419	3
21	1	15	160.684	11.1506	351.783	1	15.0038	171.2	173	69	23.5419	3
21	1	16	115.432	43.932	302.613	1	15.0038	171.2	173	69	23.5419	3
21	1	17	99.0692	28.8757	265.604	1	15.0038	171.2	173	69	23.5419	3
21	1	18	108.33	13.9307	181.179	1	15.0038	171.2	173	69	23.5419	3
21	1	19	95.7306	112.707	170.36	1	15.0038	171.2	173	69	23.5419	3
21	1	20	86.8827	83.776	239.176	1	15.0038	171.2	173	69	23.5419	3
21	1	21	115.783	118.014	226.077	1	15.0038	171.2	173	69	23.5419	3
21	1	22	87.5926	87.9908	168.224	1	15.0038	171.2	173	69	23.5419	3
21	1	23	146.636	23.6788	142.58	1	15.0038	171.2	173	69	23.5419	3
21	1	24	402.698	144.776	151.333	1	15.0038	171.2	173	69	23.5419	3
21	1	25	324.969	33.65	125.483	1	15.0038	171.2	173	69	23.5419	3
21	1	26	344.41	32.975	154.627	1	15.0038	171.2	173	69	23.5419	3
21	1	27	337.619	25.1901	114.038	1	15.0038	171.2	173	69	23.5419	3
21	1	28	318.184	20.5133	25.6306	1	15.0038	171.2	173	69	23.5419	3
21	1	29	179.223	57.6358	172.62	1	15.0038	171.2	173	69	23.5419	3
21	1	30	106.372	23.6788	299.938	1	15.0038	171.2	173	69	23.5419	3
21	1	31	90.168	45.1143	293.857	1	15.0038	171.2	173	69	23.5419	3
21	1	32	235.942	70.1925	239.397	1	15.0038	171.2	173	69	23.5419	3
21	1	33	289.578	50.2545	256.954	1	15.0038	171.2	173	69	23.5419	3
21	1	34	272.709	84.3991	192.595	1	15.0038	171.2	173	69	23.5419	3
21	1	35	185.95	36.3122	190.925	1	15.0038	171.2	173	69	23.5419	3
21	1	36	145.488	11.9946	264.46	1	15.0038	171.2	173	69	23.5419	3
21	1	37	77.4882	38.4633	171.422	1	15.0038	171.2	173	69	23.5419	3
21	1	38	78.1406	93.9922	173.861	1	15.0038	171.2	173	69	23.5419	3
21	1	39	135.369	108.377	97.8761	1	15.0038	171.2	173	69	23.5419	3
21	1	40	89.4712	129.914	157.901	1	15.0038	171.2	173	69	23.5419	3
21	1	41	65.6367	48.6672	178.857	1	15.0038	171.2	173	69	23.5419	3
21	1	42	67.3756	92.6618	155.89	1	15.0038	171.2	173	69	23.5419	3
21	1	43	51.4216	42.4681	115.46	1	15.0038	171.2	173	69	23.5419	3
21	1	44	49.9889	50.4621	96.7248	1	15.0038	171.2	173	69	23.5419	3
21	1	45	397.149	4.17281	105.854	1	15.0038	171.2	173	69	23.5419	3
21	1	46	484.081	20.5207	115.665	1	15.0038	171.2	173	69	23.5419	3
21	1	47	331.255	20.5207	41.4579	1	15.0038	171.2	173	69	23.5419	3
21	1	48	365.13	24.463	103.675	1	15.0038	171.2	173	69	23.5419	3
21	1	49	160.385	66.6569	97.2243	1	15.0038	171.2	173	69	23.5419	3
21	1	50	213.335	69.2783	62.8998	1	15.0038	171.2	173	69	23.5419	3
21	1	51	373.582	91.0353	89.102	1	15.0038	171.2	173	69	23.5419	3
21	1	52	209.007	73.0166	44.559	1	15.0038	171.2	173	69	23.5419	3
21	1	53	77.1333	76.735	42.2354	1	15.0038	171.2	173	69	23.5419	3
21	1	54	118.3	6.68411	87.3098	1	15.0038	171.2	173	69	23.5419	3
21	1	55	89.9355	103.813	246.51	1	15.0038	171.2	173	69	23.5419	3
21	1	56	70.5945	90.1683	156.864	1	15.0038	171.2	173	69	23.5419	3
21	1	57		176.581		1	15.0038	171.2	173	69	23.5419	3
21	1	58				1	15.0038	171.2	173	69	23.5419	3
21	1	59				1	15.0038	171.2	173	69	23.5419	3
21	1	60				1	15.0038	171.2	173	69	23.5419	3
22	1	1	133.588	149.541	41.8644	1	12.4329	157.9	161.7	55.9	22.4206	4
22	1	2	316.828	72.3869	36.849	1	12.4329	157.9	161.7	55.9	22.4206	4
22	1	3	233.347	123.388	104.262	1	12.4329	157.9	161.7	55.9	22.4206	4
22	1	4	236.884	114.976	87.5071	1	12.4329	157.9	161.7	55.9	22.4206	4
22	1	5	150.443	37.566	70.5796	1	12.4329	157.9	161.7	55.9	22.4206	4
22	1	6	380.38	36.7453	79.9205	1	12.4329	157.9	161.7	55.9	22.4206	4
22	1	7	351.25	91.8283	117.231	1	12.4329	157.9	161.7	55.9	22.4206	4
22	1	8	305.319	123.09	123.699	1	12.4329	157.9	161.7	55.9	22.4206	4
22	1	9	89.6274	100.212	114.009	1	12.4329	157.9	161.7	55.9	22.4206	4
22	1	10	41.28	21.03	116.079	1	12.4329	157.9	161.7	55.9	22.4206	4
22	1	11	101.159	57.9681	104.808	1	12.4329	157.9	161.7	55.9	22.4206	4
22	1	12	102.443	178.094	73.9735	1	12.4329	157.9	161.7	55.9	22.4206	4
22	1	13	145.994	139.46	89.1591	1	12.4329	157.9	161.7	55.9	22.4206	4
22	1	14	269.442	142.78	87.4209	1	12.4329	157.9	161.7	55.9	22.4206	4
22	1	15	299.397	113.44	28.2549	1	12.4329	157.9	161.7	55.9	22.4206	4
22	1	16	232.674	108.849	135.775	1	12.4329	157.9	161.7	55.9	22.4206	4
22	1	17	86.8411	53.8796	125.64	1	12.4329	157.9	161.7	55.9	22.4206	4
22	1	18	106.49	33.3951	125.721	1	12.4329	157.9	161.7	55.9	22.4206	4
22	1	19	91.4254	89.1591	115.23	1	12.4329	157.9	161.7	55.9	22.4206	4
22	1	20	43.2962	58.3505	113.092	1	12.4329	157.9	161.7	55.9	22.4206	4
22	1	21	205.761	83.6916	69.6643	1	12.4329	157.9	161.7	55.9	22.4206	4
22	1	22	276.602	87.7759	103.548	1	12.4329	157.9	161.7	55.9	22.4206	4
22	1	23	223.833	113.391	32.8144	1	12.4329	157.9	161.7	55.9	22.4206	4
22	1	24	57.2005	108.644	45.4703	1	12.4329	157.9	161.7	55.9	22.4206	4
22	1	25	230.323	137.769	11.9946	1	12.4329	157.9	161.7	55.9	22.4206	4
22	1	26	199.155	94.2898	165.106	1	12.4329	157.9	161.7	55.9	22.4206	4
22	1	27	197.654	65.2362	159.637	1	12.4329	157.9	161.7	55.9	22.4206	4
22	1	28	167.341	48.2566	152.704	1	12.4329	157.9	161.7	55.9	22.4206	4
22	1	29	121.842	73.411	80.5981	1	12.4329	157.9	161.7	55.9	22.4206	4
22	1	30	203.911	107.92	35.9395	1	12.4329	157.9	161.7	55.9	22.4206	4
22	1	31	155.248	69.5861	78.4908	1	12.4329	157.9	161.7	55.9	22.4206	4
22	1	32	139.658	26.3917	14.4259	1	12.4329	157.9	161.7	55.9	22.4206	4
22	1	33	168.747	47.3878	155.989	1	12.4329	157.9	161.7	55.9	22.4206	4
22	1	34	132.89	83.8318	118.717	1	12.4329	157.9	161.7	55.9	22.4206	4
22	1	35	91.2422	94.2898	104.881	1	12.4329	157.9	161.7	55.9	22.4206	4
22	1	36	68.6402	109.331	127.899	1	12.4329	157.9	161.7	55.9	22.4206	4
22	1	37	71.6698	57.5399	119.929	1	12.4329	157.9	161.7	55.9	22.4206	4
22	1	38	111.333	20.5133	105.041	1	12.4329	157.9	161.7	55.9	22.4206	4
22	1	39	103.368	31.6785	66.1575	1	12.4329	157.9	161.7	55.9	22.4206	4
22	1	40	69.6904	58.3627	62.503	1	12.4329	157.9	161.7	55.9	22.4206	4
22	1	41	108.385	92.3628	12.4873	1	12.4329	157.9	161.7	55.9	22.4206	4
22	1	42	120.307	84.4938	63.3076	1	12.4329	157.9	161.7	55.9	22.4206	4
22	1	43	42.9184	110.122	95.326	1	12.4329	157.9	161.7	55.9	22.4206	4
22	1	44	104.844	55.5699	35.7801	1	12.4329	157.9	161.7	55.9	22.4206	4
22	1	45	175.825	54.3287	92.5208	1	12.4329	157.9	161.7	55.9	22.4206	4
22	1	46	526.321	36.138	131.737	1	12.4329	157.9	161.7	55.9	22.4206	4
22	1	47	434.351	87.7966	129.022	1	12.4329	157.9	161.7	55.9	22.4206	4
22	1	48	397.2	101.627	123.205	1	12.4329	157.9	161.7	55.9	22.4206	4
22	1	49	277.871	217.53	111.179	1	12.4329	157.9	161.7	55.9	22.4206	4
22	1	50	155.664	141.597	107.521	1	12.4329	157.9	161.7	55.9	22.4206	4
22	1	51	52.777	177.789	22.0115	1	12.4329	157.9	161.7	55.9	22.4206	4
22	1	52	74.4258	59.9842	57.3879	1	12.4329	157.9	161.7	55.9	22.4206	4
22	1	53	187.238	79.5287	91.2565	1	12.4329	157.9	161.7	55.9	22.4206	4
22	1	54	73.7582	46.7358	31.7965	1	12.4329	157.9	161.7	55.9	22.4206	4
22	1	55	93.6633	16.6245	32.6104	1	12.4329	157.9	161.7	55.9	22.4206	4
22	1	56	94.3766		104.624	1	12.4329	157.9	161.7	55.9	22.4206	4
22	1	57	68.372		96.6883	1	12.4329	157.9	161.7	55.9	22.4206	4
22	1	58			92.2157	1	12.4329	157.9	161.7	55.9	22.4206	4
22	1	59				1	12.4329	157.9	161.7	55.9	22.4206	4
22	1	60				1	12.4329	157.9	161.7	55.9	22.4206	4
23	1	1	133.588	69.3507	65.2239	1	14.7081	155.2	157.4	60.1	24.9512	5
23	1	2	316.828	34.2843	56.2229	1	14.7081	155.2	157.4	60.1	24.9512	5
23	1	3	233.347	286.177	31.3598	1	14.7081	155.2	157.4	60.1	24.9512	5
23	1	4	236.884	227.184	122.705	1	14.7081	155.2	157.4	60.1	24.9512	5
23	1	5	150.443	51.7715	81.2658	1	14.7081	155.2	157.4	60.1	24.9512	5
23	1	6	380.38	53.8898	86.584	1	14.7081	155.2	157.4	60.1	24.9512	5
23	1	7	351.25	41.2147	115.23	1	14.7081	155.2	157.4	60.1	24.9512	5
23	1	8	305.319	59.9161	87.5693	1	14.7081	155.2	157.4	60.1	24.9512	5
23	1	9	89.6274	112.464	54.796	1	14.7081	155.2	157.4	60.1	24.9512	5
23	1	10	41.28	94.4271	71.6428	1	14.7081	155.2	157.4	60.1	24.9512	5
23	1	11	101.159	135.325	134.24	1	14.7081	155.2	157.4	60.1	24.9512	5
23	1	12	102.443	85.0883	171.01	1	14.7081	155.2	157.4	60.1	24.9512	5
23	1	13	145.994	126.821	74.273	1	14.7081	155.2	157.4	60.1	24.9512	5
23	1	14	269.442	235.738	142.709	1	14.7081	155.2	157.4	60.1	24.9512	5
23	1	15	299.397	183.099	197.942	1	14.7081	155.2	157.4	60.1	24.9512	5
23	1	16	232.674	213.775	100.442	1	14.7081	155.2	157.4	60.1	24.9512	5
23	1	17	86.8411	179.009	34.0008	1	14.7081	155.2	157.4	60.1	24.9512	5
23	1	18	106.49	159.664	36.3122	1	14.7081	155.2	157.4	60.1	24.9512	5
23	1	19	91.4254	89.4207	26.4727	1	14.7081	155.2	157.4	60.1	24.9512	5
23	1	20	43.2962	48.3644	18.6307	1	14.7081	155.2	157.4	60.1	24.9512	5
23	1	21	205.761	61.9399	73.6966	1	14.7081	155.2	157.4	60.1	24.9512	5
23	1	22	276.602	77.0056	111.139	1	14.7081	155.2	157.4	60.1	24.9512	5
23	1	23	223.833	69.369	101.886	1	14.7081	155.2	157.4	60.1	24.9512	5
23	1	24	57.2005	95.444	117.449	1	14.7081	155.2	157.4	60.1	24.9512	5
23	1	25	230.323	143.85	89.5069	1	14.7081	155.2	157.4	60.1	24.9512	5
23	1	26	199.155	69.369	97.8293	1	14.7081	155.2	157.4	60.1	24.9512	5
23	1	27	197.654	42.3978	44.656	1	14.7081	155.2	157.4	60.1	24.9512	5
23	1	28	167.341	214.441	38.7142	1	14.7081	155.2	157.4	60.1	24.9512	5
23	1	29	121.842	83.9883	65.1824	1	14.7081	155.2	157.4	60.1	24.9512	5
23	1	30	203.911	24.2654	26.3917	1	14.7081	155.2	157.4	60.1	24.9512	5
23	1	31	155.248	20.2366	58.6393	1	14.7081	155.2	157.4	60.1	24.9512	5
23	1	32	139.658	38.5878	105.056	1	14.7081	155.2	157.4	60.1	24.9512	5
23	1	33	168.747	47.4441	153.405	1	14.7081	155.2	157.4	60.1	24.9512	5
23	1	34	132.89	111.008	124.679	1	14.7081	155.2	157.4	60.1	24.9512	5
23	1	35	91.2422	52.8324	117.386	1	14.7081	155.2	157.4	60.1	24.9512	5
23	1	36	68.6402	120.878	95.0085	1	14.7081	155.2	157.4	60.1	24.9512	5
23	1	37	71.6698	79.0335	241.813	1	14.7081	155.2	157.4	60.1	24.9512	5
23	1	38	111.333	55.968	233.554	1	14.7081	155.2	157.4	60.1	24.9512	5
23	1	39	103.368	128.269	225.742	1	14.7081	155.2	157.4	60.1	24.9512	5
23	1	40	69.6904	115.426	125.548	1	14.7081	155.2	157.4	60.1	24.9512	5
23	1	41	108.385	88.8464	132.453	1	14.7081	155.2	157.4	60.1	24.9512	5
23	1	42	120.307	94.2481	113.391	1	14.7081	155.2	157.4	60.1	24.9512	5
23	1	43	42.9184	42.3978	143.649	1	14.7081	155.2	157.4	60.1	24.9512	5
23	1	44	104.844	55.1461	160.455	1	14.7081	155.2	157.4	60.1	24.9512	5
23	1	45	175.825	36.6389	51.63	1	14.7081	155.2	157.4	60.1	24.9512	5
23	1	46	526.321	80.4293	85.6983	1	14.7081	155.2	157.4	60.1	24.9512	5
23	1	47	434.351	104.536	112.438	1	14.7081	155.2	157.4	60.1	24.9512	5
23	1	48	397.2	76.4913	99.8822	1	14.7081	155.2	157.4	60.1	24.9512	5
23	1	49	277.871	100.886	66.9845	1	14.7081	155.2	157.4	60.1	24.9512	5
23	1	50	155.664	104.936	90.5802	1	14.7081	155.2	157.4	60.1	24.9512	5
23	1	51	52.777	114.258	113.747	1	14.7081	155.2	157.4	60.1	24.9512	5
23	1	52	74.4258	126.676	109.897	1	14.7081	155.2	157.4	60.1	24.9512	5
23	1	53	187.238	135.082	104.59	1	14.7081	155.2	157.4	60.1	24.9512	5
23	1	54	73.7582	95.6066	72.7281	1	14.7081	155.2	157.4	60.1	24.9512	5
23	1	55	93.6633	87.4209	8.15872	1	14.7081	155.2	157.4	60.1	24.9512	5
23	1	56	94.3766		139.993	1	14.7081	155.2	157.4	60.1	24.9512	5
23	1	57	68.372			1	14.7081	155.2	157.4	60.1	24.9512	5
23	1	58				1	14.7081	155.2	157.4	60.1	24.9512	5
23	1	59				1	14.7081	155.2	157.4	60.1	24.9512	5
23	1	60				1	14.7081	155.2	157.4	60.1	24.9512	5
24	1	1	101.256	264.678	93.2172	1	12.652	147.3	149.6	49.3	22.7217	6
24	1	2	265.945	96.6897	67.7172	1	12.652	147.3	149.6	49.3	22.7217	6
24	1	3	170.755	115.094	88.0755	1	12.652	147.3	149.6	49.3	22.7217	6
24	1	4	187.454	98.982	62.7206	1	12.652	147.3	149.6	49.3	22.7217	6
24	1	5	484.482	94.1378	71.4772	1	12.652	147.3	149.6	49.3	22.7217	6
24	1	6	424.773	39.7904	18.4104	1	12.652	147.3	149.6	49.3	22.7217	6
24	1	7	331.274	123.399	108.499	1	12.652	147.3	149.6	49.3	22.7217	6
24	1	8	203.245	134.439	145.836	1	12.652	147.3	149.6	49.3	22.7217	6
24	1	9	193.453	71.6341	117.686	1	12.652	147.3	149.6	49.3	22.7217	6
24	1	10	175.356	30.6069	118.268	1	12.652	147.3	149.6	49.3	22.7217	6
24	1	11	149.319	62.8944	144.083	1	12.652	147.3	149.6	49.3	22.7217	6
24	1	12	126.727	47.0349	110.249	1	12.652	147.3	149.6	49.3	22.7217	6
24	1	13	215.564	61.1248	31.754	1	12.652	147.3	149.6	49.3	22.7217	6
24	1	14	223.872	102.259	153.434	1	12.652	147.3	149.6	49.3	22.7217	6
24	1	15	492.56	55.3224	176.581	1	12.652	147.3	149.6	49.3	22.7217	6
24	1	16	527.981	33.65	131.795	1	12.652	147.3	149.6	49.3	22.7217	6
24	1	17	513.567	114.101	176.946	1	12.652	147.3	149.6	49.3	22.7217	6
24	1	18	473.937	55.9957	69.6142	1	12.652	147.3	149.6	49.3	22.7217	6
24	1	19	475.845	72.326	58.3627	1	12.652	147.3	149.6	49.3	22.7217	6
24	1	20	501.161	60.3173	108.14	1	12.652	147.3	149.6	49.3	22.7217	6
24	1	21	465.311	39.6892	94.343	1	12.652	147.3	149.6	49.3	22.7217	6
24	1	22	486.292	68.2036	76.1701	1	12.652	147.3	149.6	49.3	22.7217	6
24	1	23	466.177	80.6299	108.891	1	12.652	147.3	149.6	49.3	22.7217	6
24	1	24	404.258	69.6575	98.5984	1	12.652	147.3	149.6	49.3	22.7217	6
24	1	25	359.612	59.1327	111.527	1	12.652	147.3	149.6	49.3	22.7217	6
24	1	26	109.145	162.254	36.7389	1	12.652	147.3	149.6	49.3	22.7217	6
24	1	27	199.588	35.8527	131.795	1	12.652	147.3	149.6	49.3	22.7217	6
24	1	28	245.972	175.596	143.258	1	12.652	147.3	149.6	49.3	22.7217	6
24	1	29	352.435	260.288	60.9728	1	12.652	147.3	149.6	49.3	22.7217	6
24	1	30	434.995	210.627	77.1535	1	12.652	147.3	149.6	49.3	22.7217	6
24	1	31	332.607	269.608	70.8752	1	12.652	147.3	149.6	49.3	22.7217	6
24	1	32	422.885	157.598	27.7373	1	12.652	147.3	149.6	49.3	22.7217	6
24	1	33	364.619	68.7911	120.592	1	12.652	147.3	149.6	49.3	22.7217	6
24	1	34	304.461	123.307	129.249	1	12.652	147.3	149.6	49.3	22.7217	6
24	1	35	291.593	125.24	149.795	1	12.652	147.3	149.6	49.3	22.7217	6
24	1	36	257.14	123.375	112.916	1	12.652	147.3	149.6	49.3	22.7217	6
24	1	37	124.466	95.2267	127.286	1	12.652	147.3	149.6	49.3	22.7217	6
24	1	38	125.281	131.156	154.141	1	12.652	147.3	149.6	49.3	22.7217	6
24	1	39	202.192	118.376	116.352	1	12.652	147.3	149.6	49.3	22.7217	6
24	1	40	316.828	85.6539	76.2247	1	12.652	147.3	149.6	49.3	22.7217	6
24	1	41	107.969	73.7409	65.9889	1	12.652	147.3	149.6	49.3	22.7217	6
24	1	42	127.216	102.481	68.6335	1	12.652	147.3	149.6	49.3	22.7217	6
24	1	43	123.15	127.84	248.045	1	12.652	147.3	149.6	49.3	22.7217	6
24	1	44	97.8945	111.4	343.442	1	12.652	147.3	149.6	49.3	22.7217	6
24	1	45	80.8132	101.368	336.801	1	12.652	147.3	149.6	49.3	22.7217	6
24	1	46	79.1583	35.2279	271.837	1	12.652	147.3	149.6	49.3	22.7217	6
24	1	47	128.291		184.423	1	12.652	147.3	149.6	49.3	22.7217	6
24	1	48	137.192		169.375	1	12.652	147.3	149.6	49.3	22.7217	6
24	1	49	191.33		189.661	1	12.652	147.3	149.6	49.3	22.7217	6
24	1	50	382.07		276.068	1	12.652	147.3	149.6	49.3	22.7217	6
24	1	51	265.945		111.011	1	12.652	147.3	149.6	49.3	22.7217	6
24	1	52			179.481	1	12.652	147.3	149.6	49.3	22.7217	6
24	1	53			193.578	1	12.652	147.3	149.6	49.3	22.7217	6
24	1	54			242.955	1	12.652	147.3	149.6	49.3	22.7217	6
24	1	55			628.531	1	12.652	147.3	149.6	49.3	22.7217	6
24	1	56			683.59	1	12.652	147.3	149.6	49.3	22.7217	6
24	1	57				1	12.652	147.3	149.6	49.3	22.7217	6
24	1	58				1	12.652	147.3	149.6	49.3	22.7217	6
24	1	59				1	12.652	147.3	149.6	49.3	22.7217	6
24	1	60				1	12.652	147.3	149.6	49.3	22.7217	6
25	1	1	352.729	238.005	1.55955	1	12.5835	158.6	158.6	60	23.8531	8
25	1	2	125.37	207.339	48.3082	1	12.5835	158.6	158.6	60	23.8531	8
25	1	3	95.5357	209.818	50.2754	1	12.5835	158.6	158.6	60	23.8531	8
25	1	4	102.831	173.53	82.5344	1	12.5835	158.6	158.6	60	23.8531	8
25	1	5	114.243	116.278	77.4841	1	12.5835	158.6	158.6	60	23.8531	8
25	1	6	105.629	133.844	95.8592	1	12.5835	158.6	158.6	60	23.8531	8
25	1	7	325.907	128.064	150.349	1	12.5835	158.6	158.6	60	23.8531	8
25	1	8	103.59	139.59	136.115	1	12.5835	158.6	158.6	60	23.8531	8
25	1	9	95.1878	119.929	75.2444	1	12.5835	158.6	158.6	60	23.8531	8
25	1	10	115.697	103.994	126.76	1	12.5835	158.6	158.6	60	23.8531	8
25	1	11	311.872	94.0032	103.37	1	12.5835	158.6	158.6	60	23.8531	8
25	1	12	205.949	148.758	84.2604	1	12.5835	158.6	158.6	60	23.8531	8
25	1	13	401.486	90.7243	100.672	1	12.5835	158.6	158.6	60	23.8531	8
25	1	14	202.804	241.548	47.1527	1	12.5835	158.6	158.6	60	23.8531	8
25	1	15	98.6225	206.188	23.8233	1	12.5835	158.6	158.6	60	23.8531	8
25	1	16	154.432	43.3559	51.6533	1	12.5835	158.6	158.6	60	23.8531	8
25	1	17	133.267	48.0055	69.6081	1	12.5835	158.6	158.6	60	23.8531	8
25	1	18	98.4283	101.055	97.1539	1	12.5835	158.6	158.6	60	23.8531	8
25	1	19	105.018	17.4287	127.05	1	12.5835	158.6	158.6	60	23.8531	8
25	1	20	122.154	242.328	129.875	1	12.5835	158.6	158.6	60	23.8531	8
25	1	21	142.178	242.052	129.875	1	12.5835	158.6	158.6	60	23.8531	8
25	1	22	124.756	233.385	71.1658	1	12.5835	158.6	158.6	60	23.8531	8
25	1	23	112.877	187.238	90.43	1	12.5835	158.6	158.6	60	23.8531	8
25	1	24	204.453	233.507	107.869	1	12.5835	158.6	158.6	60	23.8531	8
25	1	25	123.129	183.099	77.9724	1	12.5835	158.6	158.6	60	23.8531	8
25	1	26	46.8252	289.64	117.968	1	12.5835	158.6	158.6	60	23.8531	8
25	1	27	202.3	70.5587	118.014	1	12.5835	158.6	158.6	60	23.8531	8
25	1	28	321.705	72.0982	109.39	1	12.5835	158.6	158.6	60	23.8531	8
25	1	29	105.833	105.885	79.1878	1	12.5835	158.6	158.6	60	23.8531	8
25	1	30	305.676	69.2413	35.3777	1	12.5835	158.6	158.6	60	23.8531	8
25	1	31	218.447	76.4255	31.3932	1	12.5835	158.6	158.6	60	23.8531	8
25	1	32	245.969	39.309	33.7608	1	12.5835	158.6	158.6	60	23.8531	8
25	1	33	295.445	29.1118	31.2376	1	12.5835	158.6	158.6	60	23.8531	8
25	1	34	341.951	126.895	65.4777	1	12.5835	158.6	158.6	60	23.8531	8
25	1	35	320.39	263.937	55.9578	1	12.5835	158.6	158.6	60	23.8531	8
25	1	36	252.592	296.145	50.9088	1	12.5835	158.6	158.6	60	23.8531	8
25	1	37	253.505	253.805	18.0364	1	12.5835	158.6	158.6	60	23.8531	8
25	1	38	235.654	137.949	42.7764	1	12.5835	158.6	158.6	60	23.8531	8
25	1	39	114.991	132.564	75.1056	1	12.5835	158.6	158.6	60	23.8531	8
25	1	40	154.709	120.205	56.6671	1	12.5835	158.6	158.6	60	23.8531	8
25	1	41	114.496	84.3324	27.0983	1	12.5835	158.6	158.6	60	23.8531	8
25	1	42	122.063	117.266	76.87	1	12.5835	158.6	158.6	60	23.8531	8
25	1	43	135.492	102.861	94.2481	1	12.5835	158.6	158.6	60	23.8531	8
25	1	44	104.011	34.5866	109.958	1	12.5835	158.6	158.6	60	23.8531	8
25	1	45	205.207	87.8931	132.459	1	12.5835	158.6	158.6	60	23.8531	8
25	1	46	203.845	138.274	129.632	1	12.5835	158.6	158.6	60	23.8531	8
25	1	47	104.636	121.12	104.624	1	12.5835	158.6	158.6	60	23.8531	8
25	1	48	245.153	115.412	111.419	1	12.5835	158.6	158.6	60	23.8531	8
25	1	49	201.633	60.3297	118.221	1	12.5835	158.6	158.6	60	23.8531	8
25	1	50	214.331	76.8069	83.3962	1	12.5835	158.6	158.6	60	23.8531	8
25	1	51	322.213	125.484	79.6823	1	12.5835	158.6	158.6	60	23.8531	8
25	1	52	314.714	88.5643	83.8318	1	12.5835	158.6	158.6	60	23.8531	8
25	1	53	198.974	52.1762	72.0987	1	12.5835	158.6	158.6	60	23.8531	8
25	1	54			78.6095	1	12.5835	158.6	158.6	60	23.8531	8
25	1	55			80.4621	1	12.5835	158.6	158.6	60	23.8531	8
25	1	56			73.0737	1	12.5835	158.6	158.6	60	23.8531	8
25	1	57			92.2157	1	12.5835	158.6	158.6	60	23.8531	8
25	1	58				1	12.5835	158.6	158.6	60	23.8531	8
25	1	59				1	12.5835	158.6	158.6	60	23.8531	8
25	1	60				1	12.5835	158.6	158.6	60	23.8531	8
26	1	1	103.438	283.696	130.951	1	12.6027	158.3	160.7	50.2	20.0328	4
26	1	2	172.078	255.962	225.065	1	12.6027	158.3	160.7	50.2	20.0328	4
26	1	3	171.889	270.98	279.087	1	12.6027	158.3	160.7	50.2	20.0328	4
26	1	4	147.363	236.35	104.294	1	12.6027	158.3	160.7	50.2	20.0328	4
26	1	5	90.9898	192.965	104.294	1	12.6027	158.3	160.7	50.2	20.0328	4
26	1	6	130.877	263.226	80.1822	1	12.6027	158.3	160.7	50.2	20.0328	4
26	1	7	265.268	199.046	87.7966	1	12.6027	158.3	160.7	50.2	20.0328	4
26	1	8	248.799	51.6897	73.826	1	12.6027	158.3	160.7	50.2	20.0328	4
26	1	9	286.237	156.829	45.1143	1	12.6027	158.3	160.7	50.2	20.0328	4
26	1	10	104.008	11.2101	61.4157	1	12.6027	158.3	160.7	50.2	20.0328	4
26	1	11	279.062	94.1378	39.4957	1	12.6027	158.3	160.7	50.2	20.0328	4
26	1	12	267.682	137.164	43.1477	1	12.6027	158.3	160.7	50.2	20.0328	4
26	1	13	222.731	62.339	77.6574	1	12.6027	158.3	160.7	50.2	20.0328	4
26	1	14	166.996	68.0198	95.326	1	12.6027	158.3	160.7	50.2	20.0328	4
26	1	15	100.737	123.09	30.2379	1	12.6027	158.3	160.7	50.2	20.0328	4
26	1	16	102.659	145.488	103.151	1	12.6027	158.3	160.7	50.2	20.0328	4
26	1	17	221.453	39.1282	98.0729	1	12.6027	158.3	160.7	50.2	20.0328	4
26	1	18	74.4799	75.9472	53.0385	1	12.6027	158.3	160.7	50.2	20.0328	4
26	1	19	45.4703	76.4744	51.9467	1	12.6027	158.3	160.7	50.2	20.0328	4
26	1	20	129.473	88.9263	69.7717	1	12.6027	158.3	160.7	50.2	20.0328	4
26	1	21	138.584	104.691	155.201	1	12.6027	158.3	160.7	50.2	20.0328	4
26	1	22	75.1395	96.6703	84.7045	1	12.6027	158.3	160.7	50.2	20.0328	4
26	1	23	19.8894	192.184	107.615	1	12.6027	158.3	160.7	50.2	20.0328	4
26	1	24	195.435	237.93	69.2263	1	12.6027	158.3	160.7	50.2	20.0328	4
26	1	25	85.7924	170.476	207.778	1	12.6027	158.3	160.7	50.2	20.0328	4
26	1	26	27.0399	143.258	123.133	1	12.6027	158.3	160.7	50.2	20.0328	4
26	1	27	139.096	138.907	108.499	1	12.6027	158.3	160.7	50.2	20.0328	4
26	1	28	267.644	213.192	134.544	1	12.6027	158.3	160.7	50.2	20.0328	4
26	1	29	198.529	239.622	124.001	1	12.6027	158.3	160.7	50.2	20.0328	4
26	1	30	204.267	194.051	91.2627	1	12.6027	158.3	160.7	50.2	20.0328	4
26	1	31	258.362	151.568	114.094	1	12.6027	158.3	160.7	50.2	20.0328	4
26	1	32	258.954	111.131	158.722	1	12.6027	158.3	160.7	50.2	20.0328	4
26	1	33	372.465	142.626	120.248	1	12.6027	158.3	160.7	50.2	20.0328	4
26	1	34	240.902	154.148	136.225	1	12.6027	158.3	160.7	50.2	20.0328	4
26	1	35	69.4107	150.443	127.03	1	12.6027	158.3	160.7	50.2	20.0328	4
26	1	36	80.2033	65.2034	120.287	1	12.6027	158.3	160.7	50.2	20.0328	4
26	1	37	6.42498	27.2562	97.6356	1	12.6027	158.3	160.7	50.2	20.0328	4
26	1	38	69.5233	152.663	107.856	1	12.6027	158.3	160.7	50.2	20.0328	4
26	1	39	217.821	225.051	112.478	1	12.6027	158.3	160.7	50.2	20.0328	4
26	1	40	350.638	46.5491	204.736	1	12.6027	158.3	160.7	50.2	20.0328	4
26	1	41	255.962	28.2549	253.842	1	12.6027	158.3	160.7	50.2	20.0328	4
26	1	42	29.945	75.9971	181.355	1	12.6027	158.3	160.7	50.2	20.0328	4
26	1	43	57.3359	43.932	172.914	1	12.6027	158.3	160.7	50.2	20.0328	4
26	1	44	64.526	38.3927	179.856	1	12.6027	158.3	160.7	50.2	20.0328	4
26	1	45	122.523	89.066	64.0609	1	12.6027	158.3	160.7	50.2	20.0328	4
26	1	46	211.627	44.559	66.9182	1	12.6027	158.3	160.7	50.2	20.0328	4
26	1	47	302.818	95.7535	70.573	1	12.6027	158.3	160.7	50.2	20.0328	4
26	1	48	258.446	51.6533	43.8831	1	12.6027	158.3	160.7	50.2	20.0328	4
26	1	49	159.995	94.3197	54.9809	1	12.6027	158.3	160.7	50.2	20.0328	4
26	1	50	80.3736	83.8318	58.6558	1	12.6027	158.3	160.7	50.2	20.0328	4
26	1	51	126.097	41.4183	69.9127	1	12.6027	158.3	160.7	50.2	20.0328	4
26	1	52	81.9467	65.1726	66.4579	1	12.6027	158.3	160.7	50.2	20.0328	4
26	1	53	62.8479	101.256		1	12.6027	158.3	160.7	50.2	20.0328	4
26	1	54	393.806	109.9		1	12.6027	158.3	160.7	50.2	20.0328	4
26	1	55	265.945			1	12.6027	158.3	160.7	50.2	20.0328	4
26	1	56	160.428			1	12.6027	158.3	160.7	50.2	20.0328	4
26	1	57				1	12.6027	158.3	160.7	50.2	20.0328	4
26	1	58				1	12.6027	158.3	160.7	50.2	20.0328	4
26	1	59				1	12.6027	158.3	160.7	50.2	20.0328	4
26	1	60				1	12.6027	158.3	160.7	50.2	20.0328	4
27	1	1	248.799	99.5884	102.825	1	13.1078	152.3	154.9	45.6	19.6592	4
27	1	2	286.237	103.823	55.1461	1	13.1078	152.3	154.9	45.6	19.6592	4
27	1	3	104.008	65.7409	18.0364	1	13.1078	152.3	154.9	45.6	19.6592	4
27	1	4	279.062	30.6069	79.2138	1	13.1078	152.3	154.9	45.6	19.6592	4
27	1	5	267.682	36.849	58.4651	1	13.1078	152.3	154.9	45.6	19.6592	4
27	1	6	222.731	141.834	58.4651	1	13.1078	152.3	154.9	45.6	19.6592	4
27	1	7	166.996	37.2136	59.3399	1	13.1078	152.3	154.9	45.6	19.6592	4
27	1	8	100.737	10.1235	65.1726	1	13.1078	152.3	154.9	45.6	19.6592	4
27	1	9	102.659	141.098	72.9198	1	13.1078	152.3	154.9	45.6	19.6592	4
27	1	10	221.453	67.7202	80.2889	1	13.1078	152.3	154.9	45.6	19.6592	4
27	1	11	74.4799	58.1829	123.896	1	13.1078	152.3	154.9	45.6	19.6592	4
27	1	12	45.4703	120.248	123.896	1	13.1078	152.3	154.9	45.6	19.6592	4
27	1	13	129.473	94.2951	41.3115	1	13.1078	152.3	154.9	45.6	19.6592	4
27	1	14	138.584	268.39	63.0545	1	13.1078	152.3	154.9	45.6	19.6592	4
27	1	15	75.1395	310.968	109.191	1	13.1078	152.3	154.9	45.6	19.6592	4
27	1	16	19.8894	231.018	107.57	1	13.1078	152.3	154.9	45.6	19.6592	4
27	1	17	195.435	198.075	69.2413	1	13.1078	152.3	154.9	45.6	19.6592	4
27	1	18	85.7924	107.92	35.8527	1	13.1078	152.3	154.9	45.6	19.6592	4
27	1	19	27.0399	61.9788	56.3946	1	13.1078	152.3	154.9	45.6	19.6592	4
27	1	20	139.096	115.449	34.6152	1	13.1078	152.3	154.9	45.6	19.6592	4
27	1	21	267.644	213.636	35.9395	1	13.1078	152.3	154.9	45.6	19.6592	4
27	1	22	198.529	238.755	54.7315	1	13.1078	152.3	154.9	45.6	19.6592	4
27	1	23	103.438	183.7	98.2572	1	13.1078	152.3	154.9	45.6	19.6592	4
27	1	24	172.078	99.0692	145.253	1	13.1078	152.3	154.9	45.6	19.6592	4
27	1	25	171.889	108.499	38.1626	1	13.1078	152.3	154.9	45.6	19.6592	4
27	1	26	147.363	68.1292	102.452	1	13.1078	152.3	154.9	45.6	19.6592	4
27	1	27	90.9898	140.187	132.943	1	13.1078	152.3	154.9	45.6	19.6592	4
27	1	28	130.877	228.785	168.129	1	13.1078	152.3	154.9	45.6	19.6592	4
27	1	29	265.268	268.535	126.068	1	13.1078	152.3	154.9	45.6	19.6592	4
27	1	30	204.267	243.422	61.9414	1	13.1078	152.3	154.9	45.6	19.6592	4
27	1	31	258.362	205.661	61.9414	1	13.1078	152.3	154.9	45.6	19.6592	4
27	1	32	258.954	114.094	62.4706	1	13.1078	152.3	154.9	45.6	19.6592	4
27	1	33	372.465	88.7484	48.4293	1	13.1078	152.3	154.9	45.6	19.6592	4
27	1	34	240.902	7.18421	83.7255	1	13.1078	152.3	154.9	45.6	19.6592	4
27	1	35	69.4107	82.4157	91.2565	1	13.1078	152.3	154.9	45.6	19.6592	4
27	1	36	80.2033	98.275	119.095	1	13.1078	152.3	154.9	45.6	19.6592	4
27	1	37	6.42498	22.1687	98.3052	1	13.1078	152.3	154.9	45.6	19.6592	4
27	1	38	69.5233	154.134	59.8041	1	13.1078	152.3	154.9	45.6	19.6592	4
27	1	39	217.821	206.188	53.4216	1	13.1078	152.3	154.9	45.6	19.6592	4
27	1	40	350.638	118.057	85.6539	1	13.1078	152.3	154.9	45.6	19.6592	4
27	1	41	255.962	46.7828	95.3199	1	13.1078	152.3	154.9	45.6	19.6592	4
27	1	42	29.945	89.4207	4.64749	1	13.1078	152.3	154.9	45.6	19.6592	4
27	1	43	57.3359	181.063	8.34887	1	13.1078	152.3	154.9	45.6	19.6592	4
27	1	44	64.526	162.815	1.59814	1	13.1078	152.3	154.9	45.6	19.6592	4
27	1	45	122.523	126.739	39.8127	1	13.1078	152.3	154.9	45.6	19.6592	4
27	1	46	211.627	63.8362	73.1878	1	13.1078	152.3	154.9	45.6	19.6592	4
27	1	47	302.818	20.8848	50.933	1	13.1078	152.3	154.9	45.6	19.6592	4
27	1	48	258.446	114.086	67.8353	1	13.1078	152.3	154.9	45.6	19.6592	4
27	1	49	159.995	114.946	88.6136	1	13.1078	152.3	154.9	45.6	19.6592	4
27	1	50	80.3736	154.134	36.4289	1	13.1078	152.3	154.9	45.6	19.6592	4
27	1	51	126.097	134.52	29.4884	1	13.1078	152.3	154.9	45.6	19.6592	4
27	1	52	81.9467	152.775	24.0659	1	13.1078	152.3	154.9	45.6	19.6592	4
27	1	53	62.8479	124.001	16.162	1	13.1078	152.3	154.9	45.6	19.6592	4
27	1	54	223.528	126.731	83.7033	1	13.1078	152.3	154.9	45.6	19.6592	4
27	1	55	393.806	339.555	110.402	1	13.1078	152.3	154.9	45.6	19.6592	4
27	1	56	265.945	752.778		1	13.1078	152.3	154.9	45.6	19.6592	4
27	1	57	160.428	192.9		1	13.1078	152.3	154.9	45.6	19.6592	4
27	1	58				1	13.1078	152.3	154.9	45.6	19.6592	4
27	1	59				1	13.1078	152.3	154.9	45.6	19.6592	4
27	1	60				1	13.1078	152.3	154.9	45.6	19.6592	4
28	1	1	263.994	155.918	80.818	1	13.2145	143.2	145.2	42.3	20.6279	3
28	1	2	285.738	242.955	37.5111	1	13.2145	143.2	145.2	42.3	20.6279	3
28	1	3	215.403	194.051	25.1901	1	13.2145	143.2	145.2	42.3	20.6279	3
28	1	4	78.1836	160.385	80.6969	1	13.2145	143.2	145.2	42.3	20.6279	3
28	1	5	52.9681	110.232	49.3335	1	13.2145	143.2	145.2	42.3	20.6279	3
28	1	6	34.2888	52.2316	170.325	1	13.2145	143.2	145.2	42.3	20.6279	3
28	1	7	54.9845	37.5111	76.4283	1	13.2145	143.2	145.2	42.3	20.6279	3
28	1	8	72.9565	51.6265	61.8381	1	13.2145	143.2	145.2	42.3	20.6279	3
28	1	9	55.4147	26.074	134.24	1	13.2145	143.2	145.2	42.3	20.6279	3
28	1	10	164.764	178.413	68.2075	1	13.2145	143.2	145.2	42.3	20.6279	3
28	1	11	290.385	110.63	65.7981	1	13.2145	143.2	145.2	42.3	20.6279	3
28	1	12	264.847	79.632	96.9997	1	13.2145	143.2	145.2	42.3	20.6279	3
28	1	13	256.629	61.9619	75.8315	1	13.2145	143.2	145.2	42.3	20.6279	3
28	1	14	204.234	53.8796	60.4369	1	13.2145	143.2	145.2	42.3	20.6279	3
28	1	15	159.955	165.613	63.6453	1	13.2145	143.2	145.2	42.3	20.6279	3
28	1	16	275.162	208.846	51.2981	1	13.2145	143.2	145.2	42.3	20.6279	3
28	1	17	275.162	309.339	46.6564	1	13.2145	143.2	145.2	42.3	20.6279	3
28	1	18	213.411	198.494	123.013	1	13.2145	143.2	145.2	42.3	20.6279	3
28	1	19	154.345	95.8247	76.2372	1	13.2145	143.2	145.2	42.3	20.6279	3
28	1	20	152.345	83.9078	46.2231	1	13.2145	143.2	145.2	42.3	20.6279	3
28	1	21	257.745	48.8951	85.7847	1	13.2145	143.2	145.2	42.3	20.6279	3
28	1	22	217.897	22.3133	73.5568	1	13.2145	143.2	145.2	42.3	20.6279	3
28	1	23	179.711	12.2446	42.9981	1	13.2145	143.2	145.2	42.3	20.6279	3
28	1	24	103.94	87.5196	90.3337	1	13.2145	143.2	145.2	42.3	20.6279	3
28	1	25	350.853	161.388	103.823	1	13.2145	143.2	145.2	42.3	20.6279	3
28	1	26	278.322	58.3706	40.2011	1	13.2145	143.2	145.2	42.3	20.6279	3
28	1	27	133.588	90.7161	50.9008	1	13.2145	143.2	145.2	42.3	20.6279	3
28	1	28	93.2789	62.2608	38.5878	1	13.2145	143.2	145.2	42.3	20.6279	3
28	1	29	115.902	76.2247	44.6	1	13.2145	143.2	145.2	42.3	20.6279	3
28	1	30	382.776	54.3436	11.4945	1	13.2145	143.2	145.2	42.3	20.6279	3
28	1	31	272.709	135.679	67.9809	1	13.2145	143.2	145.2	42.3	20.6279	3
28	1	32	324.438	168.923	26.116	1	13.2145	143.2	145.2	42.3	20.6279	3
28	1	33	162.162	96.2127	117.218	1	13.2145	143.2	145.2	42.3	20.6279	3
28	1	34	309.177	75.484	129.477	1	13.2145	143.2	145.2	42.3	20.6279	3
28	1	35	221.18	55.6168	87.8931	1	13.2145	143.2	145.2	42.3	20.6279	3
28	1	36	157.971	59.9161	87.3098	1	13.2145	143.2	145.2	42.3	20.6279	3
28	1	37	185.445	56.392	243.01	1	13.2145	143.2	145.2	42.3	20.6279	3
28	1	38	91.2422	79.3192	156.443	1	13.2145	143.2	145.2	42.3	20.6279	3
28	1	39	85.6714	57.1691	143.673	1	13.2145	143.2	145.2	42.3	20.6279	3
28	1	40	105.138	77.4882	154.704	1	13.2145	143.2	145.2	42.3	20.6279	3
28	1	41	215.959	80.5558	109.913	1	13.2145	143.2	145.2	42.3	20.6279	3
28	1	42	98.8988	54.6298	92.1965	1	13.2145	143.2	145.2	42.3	20.6279	3
28	1	43	201.724	63.9146	48.729	1	13.2145	143.2	145.2	42.3	20.6279	3
28	1	44	221.175	51.4721	63.3083	1	13.2145	143.2	145.2	42.3	20.6279	3
28	1	45	104.262	59.39	128.524	1	13.2145	143.2	145.2	42.3	20.6279	3
28	1	46	63.3524	39.6138	76.2372	1	13.2145	143.2	145.2	42.3	20.6279	3
28	1	47	176.378	246.617	22.0115	1	13.2145	143.2	145.2	42.3	20.6279	3
28	1	48	265.299	168.112	77.6574	1	13.2145	143.2	145.2	42.3	20.6279	3
28	1	49		96.3158	76.0418	1	13.2145	143.2	145.2	42.3	20.6279	3
28	1	50		154.568	115.732	1	13.2145	143.2	145.2	42.3	20.6279	3
28	1	51		222.325	181.536	1	13.2145	143.2	145.2	42.3	20.6279	3
28	1	52		267.442	221.619	1	13.2145	143.2	145.2	42.3	20.6279	3
28	1	53		257.857	130.313	1	13.2145	143.2	145.2	42.3	20.6279	3
28	1	54		64.2898	66.4399	1	13.2145	143.2	145.2	42.3	20.6279	3
28	1	55			87.8307	1	13.2145	143.2	145.2	42.3	20.6279	3
28	1	56			97.7232	1	13.2145	143.2	145.2	42.3	20.6279	3
28	1	57				1	13.2145	143.2	145.2	42.3	20.6279	3
28	1	58				1	13.2145	143.2	145.2	42.3	20.6279	3
28	1	59				1	13.2145	143.2	145.2	42.3	20.6279	3
28	1	60				1	13.2145	143.2	145.2	42.3	20.6279	3
29	1	1	128.575	128.074	39.5561	1	12.526	152.2	155.3	48.5	20.9369	4
29	1	2	159.955	77.8954	150.07	1	12.526	152.2	155.3	48.5	20.9369	4
29	1	3	275.162	33.6234	57.7239	1	12.526	152.2	155.3	48.5	20.9369	4
29	1	4	275.162	52.1762	18.8486	1	12.526	152.2	155.3	48.5	20.9369	4
29	1	5	213.411	94.5315	58.135	1	12.526	152.2	155.3	48.5	20.9369	4
29	1	6	154.345	101.801	14.584	1	12.526	152.2	155.3	48.5	20.9369	4
29	1	7	152.345	85.422	88.5643	1	12.526	152.2	155.3	48.5	20.9369	4
29	1	8	257.745	109.787	109.819	1	12.526	152.2	155.3	48.5	20.9369	4
29	1	9	263.994	131.452	114.888	1	12.526	152.2	155.3	48.5	20.9369	4
29	1	10	285.738	147.604	117.266	1	12.526	152.2	155.3	48.5	20.9369	4
29	1	11	215.403	131.452	79.4424	1	12.526	152.2	155.3	48.5	20.9369	4
29	1	12	78.1836	97.9613	78.2517	1	12.526	152.2	155.3	48.5	20.9369	4
29	1	13	52.9681	139.688	93.9451	1	12.526	152.2	155.3	48.5	20.9369	4
29	1	14	34.2888	42.9184	76.1575	1	12.526	152.2	155.3	48.5	20.9369	4
29	1	15	54.9845	75.1371	68.9013	1	12.526	152.2	155.3	48.5	20.9369	4
29	1	16	72.9565	198.975	163.606	1	12.526	152.2	155.3	48.5	20.9369	4
29	1	17	55.4147	60.8257	163.303	1	12.526	152.2	155.3	48.5	20.9369	4
29	1	18	164.764	182.494	47.3263	1	12.526	152.2	155.3	48.5	20.9369	4
29	1	19	290.385	359.425	121.637	1	12.526	152.2	155.3	48.5	20.9369	4
29	1	20	264.847	201.866	39.7325	1	12.526	152.2	155.3	48.5	20.9369	4
29	1	21	256.629	181.905	55.261	1	12.526	152.2	155.3	48.5	20.9369	4
29	1	22	204.234	80.536	169.581	1	12.526	152.2	155.3	48.5	20.9369	4
29	1	23	309.177	23.9411	369.497	1	12.526	152.2	155.3	48.5	20.9369	4
29	1	24	221.18	61.2165	187.739	1	12.526	152.2	155.3	48.5	20.9369	4
29	1	25	221.175	85.4879	205.088	1	12.526	152.2	155.3	48.5	20.9369	4
29	1	26	104.262	103.777	109.261	1	12.526	152.2	155.3	48.5	20.9369	4
29	1	27	63.3524	76.3461	74.2993	1	12.526	152.2	155.3	48.5	20.9369	4
29	1	28	176.378	52.2832	86.7132	1	12.526	152.2	155.3	48.5	20.9369	4
29	1	29	265.299	8.49744	115.232	1	12.526	152.2	155.3	48.5	20.9369	4
29	1	30	221.402	29.7366	49.2356	1	12.526	152.2	155.3	48.5	20.9369	4
29	1	31	157.971	45.285	322.53	1	12.526	152.2	155.3	48.5	20.9369	4
29	1	32	185.445	43.2962	153.103	1	12.526	152.2	155.3	48.5	20.9369	4
29	1	33	91.2422	79.4996	85.7281	1	12.526	152.2	155.3	48.5	20.9369	4
29	1	34	85.6714	127.383	33.6234	1	12.526	152.2	155.3	48.5	20.9369	4
29	1	35	105.138	83.934	61.793	1	12.526	152.2	155.3	48.5	20.9369	4
29	1	36	215.959	112.929	101.256	1	12.526	152.2	155.3	48.5	20.9369	4
29	1	37	98.8988	130.675	208.507	1	12.526	152.2	155.3	48.5	20.9369	4
29	1	38	201.724	138.507	180.561	1	12.526	152.2	155.3	48.5	20.9369	4
29	1	39	217.897	106.664	58.8668	1	12.526	152.2	155.3	48.5	20.9369	4
29	1	40	179.711	83.7033	149.765	1	12.526	152.2	155.3	48.5	20.9369	4
29	1	41	103.94	37.8974	81.1041	1	12.526	152.2	155.3	48.5	20.9369	4
29	1	42	350.853	31.3932	105.803	1	12.526	152.2	155.3	48.5	20.9369	4
29	1	43	278.322	55.0438	111.77	1	12.526	152.2	155.3	48.5	20.9369	4
29	1	44	133.588	25.9442	58.2858	1	12.526	152.2	155.3	48.5	20.9369	4
29	1	45	93.2789	97.9166	83.8318	1	12.526	152.2	155.3	48.5	20.9369	4
29	1	46	115.902	112.913	79.7455	1	12.526	152.2	155.3	48.5	20.9369	4
29	1	47	382.776	103.635	183.695	1	12.526	152.2	155.3	48.5	20.9369	4
29	1	48	272.709	114.258	233.228	1	12.526	152.2	155.3	48.5	20.9369	4
29	1	49	324.438	97.1285	199.076	1	12.526	152.2	155.3	48.5	20.9369	4
29	1	50	162.162	98.0766	244.588	1	12.526	152.2	155.3	48.5	20.9369	4
29	1	51		69.8469	133.515	1	12.526	152.2	155.3	48.5	20.9369	4
29	1	52		58.0169	118.428	1	12.526	152.2	155.3	48.5	20.9369	4
29	1	53		83.0272	19.1542	1	12.526	152.2	155.3	48.5	20.9369	4
29	1	54			119.993	1	12.526	152.2	155.3	48.5	20.9369	4
29	1	55				1	12.526	152.2	155.3	48.5	20.9369	4
29	1	56				1	12.526	152.2	155.3	48.5	20.9369	4
29	1	57				1	12.526	152.2	155.3	48.5	20.9369	4
29	1	58				1	12.526	152.2	155.3	48.5	20.9369	4
29	1	59				1	12.526	152.2	155.3	48.5	20.9369	4
29	1	60				1	12.526	152.2	155.3	48.5	20.9369	4
30	1	1	392.863	88.566	55.968	1	14.2625	170.2	174.6	56.2	19.4007	3
30	1	2	388.28	56.4944	53.4753	1	14.2625	170.2	174.6	56.2	19.4007	3
30	1	3	230.079	21.0515	46.1659	1	14.2625	170.2	174.6	56.2	19.4007	3
30	1	4	344.864	50.2754	70.1925	1	14.2625	170.2	174.6	56.2	19.4007	3
30	1	5	397.798	57.1741	221.781	1	14.2625	170.2	174.6	56.2	19.4007	3
30	1	6	289.257	43.3267	58.2131	1	14.2625	170.2	174.6	56.2	19.4007	3
30	1	7	393.227	63.0409	75.9472	1	14.2625	170.2	174.6	56.2	19.4007	3
30	1	8	503.458	56.4944	151.765	1	14.2625	170.2	174.6	56.2	19.4007	3
30	1	9	290.156	27.6118	58.9694	1	14.2625	170.2	174.6	56.2	19.4007	3
30	1	10	230.356	58.6558	155.664	1	14.2625	170.2	174.6	56.2	19.4007	3
30	1	11	284.305	74.8553	132.453	1	14.2625	170.2	174.6	56.2	19.4007	3
30	1	12	355.445	22.0629	8.16415	1	14.2625	170.2	174.6	56.2	19.4007	3
30	1	13	302.203	62.4706	25.172	1	14.2625	170.2	174.6	56.2	19.4007	3
30	1	14	365.07	76.1701	33.1841	1	14.2625	170.2	174.6	56.2	19.4007	3
30	1	15	456.188	76.4744	19.1542	1	14.2625	170.2	174.6	56.2	19.4007	3
30	1	16	360.964	12.4873	75.8277	1	14.2625	170.2	174.6	56.2	19.4007	3
30	1	17	282.081	74.2908	91.2327	1	14.2625	170.2	174.6	56.2	19.4007	3
30	1	18	401.166	80.536	175.65	1	14.2625	170.2	174.6	56.2	19.4007	3
30	1	19	372.081	142.608	93.5611	1	14.2625	170.2	174.6	56.2	19.4007	3
30	1	20	329.496	62.2608	115.198	1	14.2625	170.2	174.6	56.2	19.4007	3
30	1	21	309.095	58.3627	56.4058	1	14.2625	170.2	174.6	56.2	19.4007	3
30	1	22	176.583	62.2608	70.8752	1	14.2625	170.2	174.6	56.2	19.4007	3
30	1	23	125.379	88.6131	65.4777	1	14.2625	170.2	174.6	56.2	19.4007	3
30	1	24	100.732	112.663	116.299	1	14.2625	170.2	174.6	56.2	19.4007	3
30	1	25	138.662	76.388	80.818	1	14.2625	170.2	174.6	56.2	19.4007	3
30	1	26	88.6273	58.1647	107.57	1	14.2625	170.2	174.6	56.2	19.4007	3
30	1	27	119.974	79.1223	83.4283	1	14.2625	170.2	174.6	56.2	19.4007	3
30	1	28	316.432	58.6558	124.608	1	14.2625	170.2	174.6	56.2	19.4007	3
30	1	29	295.019	67.7202	62.1128	1	14.2625	170.2	174.6	56.2	19.4007	3
30	1	30	217.81	62.6103	31.2329	1	14.2625	170.2	174.6	56.2	19.4007	3
30	1	31	312.554	66.4579	93.768	1	14.2625	170.2	174.6	56.2	19.4007	3
30	1	32	169.409	55.682	52.3995	1	14.2625	170.2	174.6	56.2	19.4007	3
30	1	33	232.302	28.525	98.4003	1	14.2625	170.2	174.6	56.2	19.4007	3
30	1	34	318.337	79.3262	13.9307	1	14.2625	170.2	174.6	56.2	19.4007	3
30	1	35	282.904	33.6234	44.3134	1	14.2625	170.2	174.6	56.2	19.4007	3
30	1	36	260.915	26.0871	143.907	1	14.2625	170.2	174.6	56.2	19.4007	3
30	1	37	258.901	72.0987	142.608	1	14.2625	170.2	174.6	56.2	19.4007	3
30	1	38	370.713	91.7408	61.6295	1	14.2625	170.2	174.6	56.2	19.4007	3
30	1	39	444.059	165.553	32.8302	1	14.2625	170.2	174.6	56.2	19.4007	3
30	1	40	186.447	51.9629	11.8267	1	14.2625	170.2	174.6	56.2	19.4007	3
30	1	41	109.979	166.603	123.214	1	14.2625	170.2	174.6	56.2	19.4007	3
30	1	42	291.076	157.598	114.612	1	14.2625	170.2	174.6	56.2	19.4007	3
30	1	43	307.379	64.2398	9.7913	1	14.2625	170.2	174.6	56.2	19.4007	3
30	1	44	318.098	105.803	26.973	1	14.2625	170.2	174.6	56.2	19.4007	3
30	1	45	255.11	84.2604	39.4957	1	14.2625	170.2	174.6	56.2	19.4007	3
30	1	46	199.842	25.9541	90.5858	1	14.2625	170.2	174.6	56.2	19.4007	3
30	1	47	111.281	17.1811	49.2356	1	14.2625	170.2	174.6	56.2	19.4007	3
30	1	48	65.9049	119.086	34.2377	1	14.2625	170.2	174.6	56.2	19.4007	3
30	1	49	223.091	13.484	134.605	1	14.2625	170.2	174.6	56.2	19.4007	3
30	1	50	284.431	80.0036	221.686	1	14.2625	170.2	174.6	56.2	19.4007	3
30	1	51	288.967	60.4151	177.293	1	14.2625	170.2	174.6	56.2	19.4007	3
30	1	52	231.211	98.275	106.36	1	14.2625	170.2	174.6	56.2	19.4007	3
30	1	53		10.0389	113.441	1	14.2625	170.2	174.6	56.2	19.4007	3
30	1	54		65.8932		1	14.2625	170.2	174.6	56.2	19.4007	3
30	1	55		35.654		1	14.2625	170.2	174.6	56.2	19.4007	3
30	1	56		883.474		1	14.2625	170.2	174.6	56.2	19.4007	3
30	1	57				1	14.2625	170.2	174.6	56.2	19.4007	3
30	1	58				1	14.2625	170.2	174.6	56.2	19.4007	3
30	1	59				1	14.2625	170.2	174.6	56.2	19.4007	3
30	1	60				1	14.2625	170.2	174.6	56.2	19.4007	3
